1 **Molecular Contribution to Embryonic Aneuploidy and Genotypic Complexity During**  
2 **Initial Cleavage Divisions of Mammalian Development**

3  
4 Short Title: Molecular Control of Cleavage-Stage Aneuploidy

5  
6 Kelsey E. Brooks<sup>1</sup>, Brittany L. Daughtry<sup>1,2</sup>, Brett Davis<sup>3,4</sup>, Melissa Y. Yan<sup>3</sup>, Suzanne S. Fei<sup>3</sup>,  
7 Lucia Carbone<sup>4-7</sup>, and Shawn L. Chavez<sup>1,7-9\*</sup>

8  
9 <sup>1</sup>Division of Reproductive & Developmental Sciences, Oregon National Primate Research Center,  
10 Beaverton, Oregon 97006, USA.

11 <sup>2</sup>Department of Cell, Developmental & Cancer Biology, Oregon Health & Science University,  
12 Portland, Oregon 97239, USA.

13 <sup>3</sup>Bioinformatics & Biostatistics Unit, Oregon National Primate Research Center, Beaverton,  
14 Oregon 97006, USA.

15 <sup>4</sup>Department of Medicine, Knight Cardiovascular Institute, Oregon Health & Science University,  
16 Portland, Oregon 97239, USA.

17 <sup>5</sup>Division of Genetics, Oregon National Primate Research Center, Beaverton, Oregon 97006,  
18 USA.

19 <sup>6</sup>Department of Medical Informatics and Clinical Epidemiology, Division of Bioinformatics &  
20 Computational Biomedicine, Oregon Health & Science University, Portland, Oregon 97239,  
21 USA.

22 <sup>7</sup>Department of Molecular and Medical Genetics, Oregon Health & Science University, Portland,  
23 Oregon 97239, USA.

24 <sup>8</sup>Department of Obstetrics & Gynecology, Oregon Health & Science University, Portland, Oregon  
25 97239, USA.

26 <sup>9</sup>Department of Biomedical Engineering, Oregon Health & Science University, Portland, Oregon  
27 97239, USA.

28  
29  
30 \*Corresponding Author:

31 Shawn L. Chavez, Ph.D.

32 505 NW 185<sup>th</sup> Avenue

33 Beaverton, OR 97006

34 email: [chavesh@ohsu.edu](mailto:chavesh@ohsu.edu)

35 phone: 503-346-5423

36 **ABSTRACT**

37 Embryonic aneuploidy is highly complex, often leading to developmental arrest, implantation  
38 failure, or spontaneous miscarriage in both natural and assisted reproduction. Despite our  
39 knowledge of mitotic mis-segregation in somatic cells, the molecular pathways regulating  
40 chromosome fidelity during the error-prone cleavage-stage of mammalian embryogenesis remain  
41 largely undefined. Using bovine embryos and live-cell fluorescent imaging, we observed frequent  
42 micro-/multi-nucleation of anaphase lagging or mis-segregated chromosomes in initial mitotic  
43 divisions that underwent unilateral inheritance, re-fused with the primary nucleus, or formed a  
44 chromatin bridge with neighboring cells. A correlation between a lack of maternal and paternal  
45 pronuclei fusion (syngamy), multipolar cytokinesis, and uniparental genome segregation was also  
46 revealed and single-cell DNA-seq showed propagation of primarily non-reciprocal mitotic errors  
47 in embryonic blastomeres. Depletion of the mitotic checkpoint protein, BUB1B/BUBR1, resulted  
48 in micro-/multi-nuclei formation, atypical cytokinesis, chaotic aneuploidy, and disruption of the  
49 kinase-substrate network regulating mitotic progression and exit, culminating in embryo arrest prior  
50 to genome activation. This demonstrates that embryonic micronuclei sustain multiple fates,  
51 provides a mechanism for blastomeres with uniparental origins, and substantiates the contribution  
52 of defective checkpoint signaling and/or the inheritance of other maternally-derived factors to the  
53 high genotypic complexity afflicting preimplantation development in higher-order mammals.

54

55 [*Keywords:* aneuploidy; BUB1B/BUBR1; cytokinesis; embryo; micronuclei; mitosis;  
56 preimplantation]

## 57 INTRODUCTION

58 Multiple studies across higher-order mammalian species, including humans, have  
59 established that *in vitro*-derived embryos suffer from remarkably frequent whole chromosomal  
60 losses and gains termed aneuploidy (Vanneste et al. 2009; Daughtry et al. 2019). Depending on the  
61 type and severity of the chromosome segregation error, many aneuploid embryos will undergo  
62 developmental arrest and/or result in early pregnancy loss if transferred. Estimates of embryonic  
63 aneuploidy *in vivo* are difficult to ascertain, but ~50-70% of spontaneous miscarriages following  
64 natural conception in women are diagnosed as karyotypically abnormal (Hassold et al. 1980;  
65 Schaeffer et al. 2004). Aneuploidy can arise either meiotically during gametogenesis, or post-  
66 zygotically from the mitotic cleavage divisions of preimplantation development. Although  
67 significant effort has been put forth to identify specific contributors to meiotic chromosome mis-  
68 segregation, particularly with advanced maternal age (Webster and Schuh 2017; Schneider and  
69 Ellenberg 2019), much less is known about the molecular mechanisms underlying mitotic  
70 aneuploidy generation. This is in spite of findings that mitotic errors are equally or more prevalent  
71 than meiotic errors and arise independently of maternal age or fertility status (Vanneste et al. 2009;  
72 Chavez et al. 2012; McCoy et al. 2015a; McCoy et al. 2015b). Since the first three mitotic divisions  
73 are the most error-prone and activation of the embryonic genome does not occur until the 4- to 8-  
74 cell stage in the majority of mammals (Braude et al. 1988; Plante et al. 1994), it was suggested that  
75 maternally-inherited signaling factors regulating mitotic chromosome segregation may be lacking  
76 or compromised in early mammalian preimplantation embryos (Mantikou et al. 2012; Tsuiko et al.  
77 2019).

78 There are several known contributors to aneuploidy and tumorigenesis in somatic cells, such  
79 as loss or prolonged chromosome cohesion, defective spindle attachments, abnormal centrosome  
80 number, and relaxed cell cycle checkpoints (Soto et al. 2019). Regardless of the mechanism,  
81 chromosomes that are mis-segregated during meiosis or mitosis will become encapsulated into  
82 micronuclei and can contribute to aneuploidy in subsequent divisions. In embryos, research has

83 focused on the spindle assembly checkpoint (SAC) and primarily with mice that normally exhibit  
84 a low incidence of micronucleation and aneuploidy (Bolton et al. 2016; Treff et al. 2016; Vazquez-  
85 Diez et al. 2016). Thus, murine embryos are often treated with chemicals that inhibit spindle  
86 formation or SAC function to induce chromosome mis-segregation (Wei et al. 2011; Bolton et al.  
87 2016; Vazquez-Diez et al. 2019; Singla et al. 2020), which target multiple genes and can have  
88 variable or off-target effects (Gascoigne and Taylor 2008; Miyazawa 2011). By monitoring bipolar  
89 attachment of spindle microtubules to kinetochores during mitosis, the mitotic checkpoint complex  
90 (MCC) prevents activation of the anaphase promoting complex/cyclosome (APC/C) and delays  
91 mitotic progression in the absence of stable bipolar kinetochore-microtubule attachments. This  
92 delay, however, is only temporary and cells with an unsatisfied checkpoint will eventually arrest or  
93 exit mitosis prematurely. The core components of the MCC are evolutionarily conserved and  
94 include CDC20, as well as the serine/threonine kinases, BUB1B, BUB3, and MAD2. BUB1B (also  
95 known as BUBR1), the largest of the MCC proteins, is normally present throughout the cell cycle  
96 and proposed to have both SAC-dependent and independent functions (Elowe et al. 2010). Besides  
97 being directly associated with unattached or incorrectly attached kinetochores, BUB1B also has a  
98 role in stabilizing kinetochore–microtubule attachments and chromosome alignment via BUB3  
99 binding (Meraldi and Sorger 2005). Without BUB1B, the MCC no longer localizes to unattached  
100 kinetochores to prevent incorrect or deficient spindle attachments, resulting in the generation of  
101 aneuploid daughter cells (Lampson and Kapoor 2005). Whether the MCC is functional in the initial  
102 mitotic divisions of mammalian preimplantation development is currently unclear (Wei et al. 2011;  
103 Vazquez-Diez et al. 2019) and remains to be studied in a mammal that normally undergoes a high  
104 incidence of mitotic aneuploidy without the need for chemical induction.

105 Cattle are mono-ovulatory and share other key characteristics of preimplantation  
106 development with humans, including the timing of the first mitotic divisions, stage at which the  
107 major wave of embryonic genome activation (EGA) occurs, and approximate percentage of

108 embryos that typically reach the blastocyst stage (Alper et al. 2001; Wong et al. 2010; Sugimura et  
109 al. 2012). Furthermore, single-nucleotide polymorphism (SNP) genotyping and next generation  
110 sequencing (NGS) revealed that the frequency of aneuploidy in cattle is likely similar to humans  
111 (Destouni et al. 2016; Hornak et al. 2016; Tsuiko et al. 2017). Destouni *et al.* also demonstrated  
112 that bovine zygotes can segregate parental genomes into different blastomeres during the first  
113 cleavage division, but the mechanism by which this occurs has not yet been determined (Destouni  
114 et al. 2016). Thus, with the ethical and technical limitations of human embryo research, bovine  
115 embryos represent a suitable model for studying the dynamics of micronuclei formation and  
116 aneuploidy generation during preimplantation development. In this study, we used a combination  
117 of time-lapse and live-cell fluorescent imaging with single-cell DNA-seq (scDNA-seq) for copy  
118 number variation (CNV) analysis, to assess mitotic divisions in bovine embryos from the zygote to  
119 12-cell stage and visualize chromosome segregation in real-time. We also evaluated the lack of  
120 MCC function on cytokinesis, micronucleation, mitotic aneuploidy, and developmental arrest to  
121 determine if defective checkpoint signaling contributes to aneuploidy during early embryogenesis  
122 in higher-order mammals.

123

## 124 **RESULTS**

### 125 ***Micro- and multi-nucleation is common in early cleavage-stage bovine embryos***

126 While micronuclei-like structures have been detected in bovine embryos previously (Yao et  
127 al. 2018), their prevalence or whether they were associated with a particular stage of  
128 preimplantation development was not determined. To address this, we generated a large number  
129 (N=53) of bovine embryos by *in vitro* fertilization (IVF) and fixed them at the zygote to blastocyst  
130 stage to evaluate DNA integrity with DAPI and nuclear structure by immunostaining for the nuclear  
131 envelope marker, LAMIN-B1 (LMNB1; **Fig. 1A**). Immunofluorescent labeling revealed the  
132 presence of micronuclei as early as the zygote stage that were distinct from the maternal and

133 paternal pronuclei (**Fig. 1B**). Several micronuclei, as well as multiple nuclei (multi-nuclei) of  
134 similar size, were also detected at the 2- to 4-cell stage (**Fig. 1C**). Overall, ~37.7% (N=20/53) of  
135 early cleavage-stage embryos exhibited micro-/multi-nuclei formation in one or more blastomeres.  
136 This suggests that unlike mice, which rarely exhibit micronucleation during initial mitotic divisions  
137 (Vazquez-Diez et al. 2019), encapsulation of mis-segregated chromosomes into micronuclei prior  
138 to EGA is conserved between cattle and primates (Chavez et al. 2012; Daughtry et al. 2019). A  
139 similar examination of blastocysts also immunostained for the trophoblast marker, Caudal Type  
140 Homeobox 2 (CDX2), demonstrated that micronuclei often reside in the trophectoderm (TE; **Fig.**  
141 **1D**), but can also be contained within the inner cell mass (ICM) of the embryo (**Fig. 1E**).

142

#### 143 *Live-cell fluorescent imaging reveals micronuclei fate and origin of uniparental cells*

144 To confirm the frequency of micro- and multi-nuclei in cleavage-stage embryos and  
145 determine the fate of these nuclear structures in real-time, we microinjected bovine zygotes (N=90)  
146 with fluorescently labeled modified mRNAs and monitored the first three mitotic divisions by live-  
147 cell confocal microscopy (**Fig. 1A**). While Histone H2B and/or LMNB1 were used to visualize  
148 DNA and nuclear envelope, respectively, F-actin was injected to distinguish blastomeres  
149 (**Supplemental Movie S1**). Of the microinjected embryos, ~18.9% (N=17/90) failed to complete  
150 cytokinesis during microscopic evaluation, whereas ~53.3% (N=49/90) exhibited normal bipolar  
151 divisions and ~27.8% (N=25/90) underwent multipolar divisions from 1- to 3-cells or more (**Fig.**  
152 **2A**). In accordance with our immunostaining findings, ~31.1% (N=28/90) of the embryos contained  
153 micro- and/or multi-nuclei and anaphase lagging of chromosomes was detected prior to their  
154 formation in three of these embryos at the zygote (**Fig. 2B**) or 2-cell stage (**Fig. 2C**). Micro- and  
155 multi-nucleation was more frequently associated with bipolar divisions (**Fig. 2A**) and an  
156 examination of micronuclei fate demonstrated an equal incidence of unilateral inheritance (**Fig. 2D**)  
157 or fusion back with the primary nucleus (**Fig. 2E**), while a smaller percentage appeared to form a

158 chromatin bridge with a neighboring blastomere (**Fig. 2F**, **Supplemental Fig. S1** and  
159 **Supplemental Movie S1**). Interestingly, the majority of multipolar embryos (76%; N=19/25)  
160 underwent an abnormal division after bypassing syngamy, or the fusion of maternal and paternal  
161 pronuclei (**Fig. 2G**), and/or produced daughter cells that did not contain any apparent nuclear  
162 structure (**Fig. 2H**). These results helped explain previous findings of blastomeres with uniparental  
163 origins and those that completely lacked nuclear DNA when assessed for CNV, respectively  
164 (Destouni et al. 2016; Ottolini et al. 2017; Daughtry et al. 2019; Middelkamp et al. 2020).

165

### 166 *Non-reciprocal mitotic errors and chaotic aneuploidy are prevalent in early cleavage divisions*

167 Although SNP arrays or NGS have been used previously to assess aneuploidy in cleavage-  
168 stage bovine embryos, these studies reported a large range in aneuploidy frequency (~32-85%),  
169 examined a single stage of development, and/or evaluated only a portion of the embryo (Destouni  
170 et al. 2016; Hornak et al. 2016; Tsuiko et al. 2017). Therefore, our next objective was to determine  
171 the precise frequency of aneuploidy in a large number of bovine embryos (N=38) disassembled into  
172 individual cells at multiple cleavage stages using high-resolution scDNA-seq (**Fig. 1A** and  
173 **Supplemental Table S1**). All cells from the 38 embryos were assessed to ensure an accurate  
174 representation of the overall embryo, resulting in a total of 133 blastomeres analyzed from the 2-  
175 to 12-cell stage (**Fig. 3A**). Based on previously described criteria (Daughtry et al. 2019), we  
176 classified 25.6% (N=34/133) of blastomeres as euploid, 35.3% (N=47/133) as aneuploid, 3%  
177 (N=4/133) solely containing segmental errors, and 17.3% (N=23/133) exhibiting chaotic  
178 aneuploidy, with the remaining cells either failing WGA (10.5%; N=14/133) or identified as empty  
179 due to the amplification and detection of only mitochondrial DNA (8.3%; N=11/133). After  
180 reconstructing each embryo, we determined that ~16% (N=6/38) were entirely euploid, whereas  
181 ~55% (N=21/38) were comprised of only aneuploid cells (**Fig. 3B**). An additional ~29% (N=11/38)  
182 were categorized as mosaic since they contained a combination of both euploid and aneuploid

183 blastomeres. Of the embryos with mosaicism, ~18% (N=2/11) had incurred segmental errors only,  
184 or DNA breaks of 15 Mb in length or larger that did not affect the whole chromosome. The X  
185 chromosome was by far the most frequently impacted by whole chromosomal losses and gains,  
186 whereas chromosome 5 (human chromosomes 12 and 22), 7 (human chromosomes 5 and 19), 11  
187 (human chromosomes 3 and 9), and 29 (human chromosome 11) were commonly subjected to DNA  
188 breakage (**Fig. 3C**). While meiotic mis-segregation was identified in ~16% (N=6/38) of the  
189 embryos (**Fig. 3D**), mitotic aneuploidy accounted for the majority (~66%; N=25/38) of errors, with  
190 the remaining ~18% (N=7/38) exhibiting the genotypic complexity characteristic of chaotic  
191 aneuploidy (**Fig. 3E**). In addition, most (~67%; N=4/6) of the embryos with meiotic errors also  
192 experienced mitotic mis-segregation of different chromosomes than those originally affected during  
193 meiosis (**Fig. 3F**) and reciprocal losses and gains, whereby chromosomes lost from one blastomere  
194 are found in a sister blastomere, accounted for only ~25% (N=7/29) of the mitotic errors (**Fig. 3D**  
195 and **3F**).

196

### 197 *MCC deficiency induces atypical cytokinesis, blastomere asymmetry and embryo arrest*

198 Since the chromosome constitution and division dynamics observed in certain embryos  
199 indicated deficient cell cycle checkpoints and there are conflicting reports on whether the MCC is  
200 functional at the early cleavage stage in mammals (Wei et al. 2011; Vazquez-Diez et al. 2019), our  
201 next objective was to determine if a lack of adequate checkpoints was associated with micronuclei  
202 formation and aneuploidy (**Fig. 1A**). Given negligible effects on mouse development from  
203 knockdown of another MCC component (Vazquez-Diez et al. 2019), we focused our attention on  
204 BUB1B/BUBR1, the largest of the MCC proteins that is present throughout the cell cycle (Elowe  
205 et al. 2010). Two non-overlapping morpholino antisense oligonucleotides (MAOs) were designed  
206 to specifically inhibit the translation of BUB1B mRNA by targeting the ATG translation start site  
207 (BUB1B MAO #1) or a sequence upstream within the 5' UTR (BUB1B MAO #2) and tested before



208 use in embryos (**Supplemental Fig. S2**). Zygotes were microinjected with either BUB1B MAO #1  
209 (N=48), BUB1B MAO #2 (N=36), or standard control (Std Control) MAO (N=81) and cultured  
210 under a time-lapse imaging microscope to monitor developmental dynamics. Each embryo was  
211 morphologically assessed and categorized as having either normal or abnormal divisions for  
212 comparison to untreated (non-injected) embryos (N=180). In the BUB1B MAO #1 treatment group,  
213 37.5% (N=18/48) of the zygotes failed to undergo the first cleavage division (**Table 1**) and a subset  
214 (8.3%; N=4/48) of these embryos attempted to divide by forming multiple cleavage furrows (**Fig.**  
215 **4A**), but never successfully completed cytokinesis (**Supplemental Movie S2**). Of those BUB1B  
216 MAO #1 zygotes that divided, only a small proportion (18.8%; N=9/48) were normal bipolar  
217 divisions. Rather, many embryos (63.0%; N=17/27) exhibited abnormal cytokinesis, including  
218 multipolar divisions and/or blastomere asymmetry (**Supplemental Movie S3** and **Supplemental**  
219 **Movie S4**, respectively), with similar results obtained following injection with BUB1B MAO #2  
220 (**Table 1** and **Fig. 4B**). Despite the phenotypic similarities between the two non-overlapping MAOs,  
221 we further assessed BUB1B MAO specificity by conducting embryo rescue experiments with  
222 modified BUB1B mRNA that would not be directly targeted by the MAO. BUB1B mRNA with a  
223 mutated MAO binding sequence was microinjected into zygotes, along with BUB1B MAO #1  
224 (N=51), and embryos cultured up to the blastocyst stage (**Fig. 4C**). While no embryos formed  
225 blastocysts following injection of either the BUB1B MAO #1 or #2, 45% (N=23/51) of the BUB1B  
226 MAO #1+mRNA co-injected embryos underwent cleavage divisions and reached the blastocyst  
227 stage (**Fig. 4D**). This percentage was similar to that obtained from the non-injected embryos and  
228 following injection with the Std Control MAO, confirming that the knockdown of BUB1B  
229 expression and rescue of BUB1B-induced mitotic defects were specific.

230

231

232 ***MCC deficient embryos exhibit chaotic aneuploidy and asymmetric genome distribution***

233 Because BUB1B MAO-injected embryos underwent atypical cytokinesis, we examined  
234 nuclear structure and CNV in MCC-deficient embryos by immunofluorescence and scDNA-seq,  
235 respectively (**Fig. 1A**). LMNB1 immunostaining revealed both micro- and multi-nuclei in BUB1B  
236 MAO #1 and #2 treated embryos that did not attempt division or were unable to complete the first  
237 cytokinesis (**Fig. 4E**). Similar abnormal nuclear structures, as well as empty blastomeres, were also  
238 observed in BUB1B MAO-injected embryos that successfully divided. Moreover, DNA that lacked  
239 or had defective nuclear envelope was also apparent in these MCC deficient embryos. Disassembly  
240 of the embryos into individual cells for assessment of DNA content and CNV analysis demonstrated  
241 that while some euploid blastomeres were obtained following BUB1B MAO injection, MCC  
242 deficiency mostly produced blastomeres with chaotic aneuploidy (**Fig. 4F**). Analogous to some of  
243 the non-injected controls (**Fig. 3E**), a complete loss of certain chromosomes and a gain of up to 5-  
244 6 copies of other chromosomes were detected, suggesting that the lack of MCC function permits  
245 premature mitotic exit and asymmetrical genome distribution in embryos.

246

247 ***Lack of an intact MCC at the first division impacts cell cycle progression and kinase activity***

248 Given that inappropriate expression of maternally-inherited signaling factors has been  
249 suggested to regulate early mitotic chromosome segregation in mammalian embryos (Mantikou et  
250 al. 2012; Tsuiko et al. 2019), we next determined whether MCC deficiency impacted the expression  
251 of other key developmental genes (**Fig. 1A**). Therefore, the relative abundance of maternal-effect,  
252 mitotic, cell cycle, EGA, and cell survival genes was assessed in individual BUB1B MAO #1 versus  
253 non-injected and Std Control-injected MAO embryos (**Supplemental Fig. S3** and **Supplemental**  
254 **Table S2**) via microfluidic quantitative RT-PCR (qRT-PCR). Besides *BUB1B*, other genes  
255 involved in cytokinesis and chromosome segregation such as amyloid beta precursor protein  
256 binding family B member 1 (*APBB1*), which inhibits cell cycle progression, aurora kinase B

257 (*AURKB*), Polo-like kinase 1 (*PLK1*), and Ribosomal protein S6 kinase alpha-5 (*RPS6KA5*) were  
258 significantly downregulated in BUB1B MAO-injected embryos relative to the controls (**Fig. 5A**;  
259  $p \leq 0.05$ ). Additional genes, including those associated with the extracellular matrix (cartilage acidic  
260 protein 1; *CRTAC1* and ADAM metalloproteinase with thrombospondin type 1 motif 2; *ADAMTS2*)  
261 and stress response (Endoplasmic Reticulum Lectin 1; *ERLECI*) were also significantly decreased  
262 in MCC deficient embryos in comparison to the non-injected and Std Control MAO-injected  
263 embryos. In contrast, genes involved in cell cycle progression such as Epithelial Cell Transforming  
264 2 (*ECT2*), pogo transposable element derived with ZNF domain (*POGZ*), centromere protein F  
265 (*CENPF*), and Ribosomal protein S6 kinase alpha-4 (*RPS6KA4*), were significantly upregulated in  
266 BUB1B MAO-injected embryos, along with microtubule polymerization (HAUS augmin like  
267 complex subunit 6; *HAUS6*) or orientation (Synaptonemal complex protein 3; *SCP3*) genes (**Fig.**  
268 **5B**;  $p \leq 0.05$ ). Thus, in the absence of a functional MCC, we postulate that zygotes still entered  
269 mitosis, but were unable to obtain proper microtubule-kinetochore attachments prior to the first  
270 cytokinesis despite several attempts. This resulted in dysregulation of other kinases or cytoskeletal  
271 genes important for mitotic exit, cytokinesis, and chromosome segregation, confirming that MCC  
272 deficiency contributes to the large genotypic complexity observed during early cleavage divisions  
273 in higher-order mammals.

274

## 275 **DISCUSSION**

276 Aneuploidy is a major cause of embryo arrest, implantation failure, and spontaneous  
277 miscarriage across most mammalian species and yet, relatively little is still known about the  
278 molecular mechanism(s) underlying aneuploidy generation and pregnancy loss. While some  
279 understanding of mitotic mis-segregation derives from dividing somatic cells, the first embryonic  
280 cleavage divisions are fundamentally different since almost all of the mRNAs and proteins required  
281 for cytokinesis and chromosome segregation are maternally-inherited (Mantikou et al. 2012; Tsuiko

282 et al. 2019). In addition, unlike tumors and cancer cells, which often overexpress cell cycle  
283 checkpoints and rarely sustain SAC gene mutations (Schvartzman et al. 2010), cleavage-stage  
284 human embryos have been shown to underexpress checkpoints and overexpress cell cycle drivers  
285 (Kiessling et al. 2010). Knockdown of a specific MCC component in mouse zygotes, however, had  
286 no effect on early cleavage divisions when mitotic aneuploidy typically occurs in other mammals  
287 (Vazquez-Diez et al. 2019). Moreover, because these studies were conducted with mice, which  
288 naturally exhibit a low incidence (~1-4%) of aneuploidy, the embryos were treated with chemicals  
289 to induce chromosome mis-segregation (Wei et al. 2011; Bolton et al. 2016; Treff et al. 2016;  
290 Vazquez-Diez et al. 2019; Singla et al. 2020). Using a combination of live-cell imaging, scDNA-  
291 seq, and genetic manipulation, we visualized mitotic chromosome segregation in real-time from the  
292 zygote to the ~12-cell stage and assessed the role of the MCC in embryos from an animal model  
293 that normally suffers from a comparable incidence of aneuploidy and developmental arrest as  
294 humans.

295 To determine the prevalence of chromosome mis-segregation in initial mitotic divisions, we  
296 first assessed the frequency of micronucleation throughout bovine preimplantation development.  
297 Of the cleavage-stage embryos examined by immunostaining or live-cell imaging, over ~30%  
298 contained micro- or multi-nuclei and anaphase lagging of chromosomes was detected in certain  
299 embryos prior to micronuclei formation. When we evaluated the cellular behaviors that might  
300 indicate how these atypical nuclear structures formed, we determined that most micronuclei-  
301 containing embryos underwent normal bipolar divisions, excluding abnormal cytokinesis as the  
302 primary mechanism. However, multipolar divisions were associated with a lack of syngamy and  
303 often produced cells that did not contain any apparent nuclear structure (**Fig. 6A**). In contrast to  
304 mouse embryos, which sustain spatial separation of parental genomes by dual-spindle formation  
305 (Mayer et al. 2000; Reichmann et al. 2018), embryos from other mammals are still thought to  
306 exhibit syngamy at the zygote stage (Kai et al. 2018; Yao et al. 2018). By avoiding syngamy and

307 undergoing multipolar cytokinesis, zygotes differentially segregate entire parental genomes to  
308 daughter cells, providing a mechanism for previous findings of blastomeres with uniparental origins  
309 in both cattle and primates (Destouni et al. 2016; Ottolini et al. 2017; Daughtry et al. 2019;  
310 Middelkamp et al. 2020).

311 Examination of micronuclei fate in subsequent divisions revealed an equal incidence of  
312 unilateral inheritance and fusion back with the primary nucleus, with a smaller percentage of  
313 embryos exhibiting a chromatin bridge between blastomeres following micronuclei formation (**Fig.**  
314 **6B**). Because cancer cell micronuclei have been shown to endure extensive DNA damage upon re-  
315 fusion with the primary nucleus (Crasta et al. 2012; Zhang et al. 2015), chromosomal integrity and  
316 the effects on developmental outcome will likely depend on which of these events occur. The  
317 significance of the chromatin bridging and whether it exacerbates aneuploidy or restores euploidy  
318 is unknown, but we suspect that the exchange of genetic material contributes to the large genotypic  
319 complexity reported in IVF embryos (Vanneste et al. 2009; Chavez et al. 2012; McCoy et al. 2015a;  
320 Daughtry et al. 2019). A similar assessment of bovine blastocysts determined that micronuclei often  
321 reside in the placental-derived TE, but can also be contained within the ICM of the embryo. While  
322 the presence of micronuclei in the ICM may be more detrimental, a recent study reported that there  
323 is no significant enrichment of aneuploid cells between the TE and ICM in human blastocysts  
324 (Starostik et al. 2020). Thus, micronuclei formation at this stage of development is probably more  
325 tolerated due to increased cell number or its impact on overall ploidy is not apparent until the  
326 postimplantation stages, which warrants further investigation.

327 Given the large aneuploidy range reported in previous bovine studies (Destouni et al. 2016;  
328 Hornak et al. 2016; Tsuiko et al. 2017), as well as differences in the stage or proportion of the  
329 embryo analyzed and methods used, we sought to comprehensively assess aneuploidy in all cells  
330 of embryos at multiple cleavage stages. After reconstructing each embryo and combining the  
331 results, we determined that ~55% of the embryos contained only aneuploid cells, whereas another

332 ~29% were mosaic, all of which were primarily the product of non-reciprocal mitotic errors. In  
333 those embryos with meiotic errors, most also experienced mitotic mis-segregation of different  
334 chromosomes than those originally affected during meiosis. The remaining aneuploid embryos  
335 exhibited a complete loss and/or a gain of up to 6 copies of chromosomes characteristic of chaotic  
336 aneuploidy. This indicates that embryos with meiotic mis-segregation are more prone to mitotic  
337 errors and further propagated by subsequent divisions, further explaining the genotypic complexity  
338 observed in IVF embryos (Vanneste et al. 2009; Chavez et al. 2012; McCoy et al. 2015a; Daughtry  
339 et al. 2019).

340         Because of the apparent disparity on whether the MCC is functional in the early cleavage  
341 divisions of mammalian embryogenesis in previous studies (Wei et al. 2011; Vazquez-Diez et al.  
342 2019), we investigated the consequences of MCC inhibition by directly targeting BUB1B in bovine  
343 zygotes. Following injection, BUB1B MAO embryos either failed to divide even after several  
344 attempts or exhibited abnormal divisions that were multipolar and/or asymmetrical (**Fig. 6C**).  
345 Furthermore, immunostaining of the BUB1B MAO treated embryos that did divide revealed  
346 blastomeres with severely abnormal nuclear structures or those that were completely devoid of  
347 DNA. CNV analysis of blastomeres that contained nuclear DNA showed a predominance of chaotic  
348 aneuploidy, with a complete loss or excessive number of chromosomal copies as described in some  
349 non-injected embryos and reported in primate embryos with multipolar divisions (Ottolini et al.  
350 2017; Daughtry et al. 2019). Without BUB1B, we speculate that embryos were unable to obtain  
351 proper microtubule-kinetochore attachments prior to the first cytokinesis, resulting in failed MCC  
352 and arrest, or premature cell division and chromosome mis-segregation due to MCC dysregulation.  
353 The role of another MCC protein, Mad2, was also recently investigated in mouse embryos and  
354 while 40% Mad2 knockdown had no effect on blastocyst formation, it did double the number of  
355 micronuclei present at the morula stage (Vazquez-Diez et al. 2019). Both MAD2 and BUB1B bind  
356 CDC20 to prevent activation of the APC, but *in vitro* binding assays demonstrated that BUB1B is

357 12 times more effective than MAD2 in inhibiting CDC20 (Fang 2002). In addition, it was shown  
358 in *Drosophila* that the recruitment of CDC20 to the kinetochore requires BUB1B and not MAD2  
359 (Li et al. 2010) and that BUB1B is maternally inherited (Perez-Mongiovi et al. 2005). Thus, these  
360 studies help explain the robust effect of BUB1B deficiency observed here and suggests that  
361 inhibition of the MCC via BUB1B knockdown impacts early cleavage divisions in higher-order  
362 mammals by allowing multipolar cytokinesis and asymmetrical genome partitioning to occur.

363 The expression of additional genes involved in mitosis and cell cycle progression was also  
364 affected by MCC inhibition and indicates that their abundance may be regulated by BUB1B  
365 availability in embryos. One of the downregulated genes included *Plk1*, which is conserved across  
366 both mammalian and non-mammalian species and has been shown to be important for the first  
367 mitosis in mouse zygotes (Baran et al. 2016). In somatic cells, PLK1 localization to non-attached  
368 kinetochores is required for the phosphorylation of BUB1B (Elowe et al. 2007) and promotes the  
369 interaction of BUB1B with phosphatases that, in turn, inhibit excessive aurora kinase activity at  
370 kinetochores through positive feedback (Suijkerbuijk et al. 2012). Therefore, the removal of  
371 BUB1B or inhibition of PLK1 increases the phosphorylation of kinase substrates, which has been  
372 shown to include *ECT2*, *POGZ*, and *HAUS6* (Kettenbach et al. 2011; Bibi et al. 2013), genes  
373 identified as upregulated following BUB1B knockdown here. Since BUB1B MAO-injected  
374 embryos also exhibited increased expression of *CENP-F* and *SYCP3* and both are regulated by  
375 PLK1 phosphorylation in other contexts (Santamaria et al. 2011), we suspect that these genes also  
376 serve as kinase substrates important for mitotic progression during embryogenesis. Additionally,  
377 we note that common maternal genotype variants spanning *PLK4*, another polo-like kinase family  
378 member, has been reported to play a role in tripolar divisions and aneuploidy in human embryos  
379 (McCoy et al. 2015a; McCoy et al. 2018). Thus, BUB1B likely cooperates with this regulatory  
380 network of kinases and their substrates to reinforce MCC function and ensure chromosome fidelity  
381 in embryos. Collectively, our results confirm a role for the MCC in maintaining proper chromosome

382 segregation in initial cleavage divisions and show that the genotypic complexity observed in  
383 preimplantation embryos from higher-order mammals is likely contributed by deficiency in BUB1B  
384 and/or other maternally-inherited factors.

385

## 386 **MATERIALS AND METHODS**

### 387 *Experimental design*

388 Using a combination of live-cell imaging, scDNA-seq for CNV analysis, and genetic  
389 manipulation of embryos, we developed an experimental approach to assess mitotic divisions and  
390 chromosome segregation throughout bovine preimplantation development (**Fig. 1A**). First, we  
391 fertilized mature oocytes, cultured resultant zygotes under a time-lapse imaging microscope to  
392 monitor embryo developmental dynamics, and evaluated DNA integrity and nuclear structure by  
393 immunofluorescence up to blastocyst stage (N=53). We confirmed our findings by live-cell  
394 confocal microscopy of zygotes microinjected with fluorescently-labeled modified mRNAs and  
395 visualization of the initial mitotic divisions in real-time (N=90). Cleavage-stage embryos between  
396 2- and 12-cells were then disassembled into single blastomeres for comprehensive assessment of  
397 meiotic and/or mitotic errors (N=38). Lastly, the role of the MCC in aneuploidy generation was  
398 determined by microinjecting zygotes with BUB1B MAOs (N=84) or a Std Control MAO (N=81)  
399 for comparison to non-injected embryos (N=180) and embryos co-injected with BUB1B MAO and  
400 BUB1B modified mRNA (N=85) by time-lapse monitoring, immunostaining, CNV analysis, and/or  
401 microfluidic quantitative RT-PCR.

### 402 *Reagents and media*

403 All chemicals were obtained from Sigma-Aldrich (St. Louis, MO, USA) or Fisher Scientific  
404 (Pittsburgh, PA, USA) unless otherwise stated. Tyrode's albumin lactate pyruvate (TALP) medium  
405 with HEPES (TALP-HEPES) was used as washing media and contained 114mM NaCl, 3.2mM KCl,



406 25mM NaHCO<sub>3</sub>, 0.34mM NaH<sub>2</sub>PO<sub>4</sub>-H<sub>2</sub>O, 10mM C<sub>3</sub>H<sub>5</sub>NaO<sub>3</sub>, 2mM CaCl<sub>2</sub>-H<sub>2</sub>O, 0.5mM MgCl<sub>2</sub>-  
407 6H<sub>2</sub>O, 10.9 mM Hepes, 0.25mM sodium pyruvate, 1μl/ml Phenol Red, 3mg/ml FAF-BSA, 100μM  
408 Gentamicin Sulfate. For fertilization, TALP-IVF was used and comprised of 114mM NaCL, 3.2mM  
409 KCl, 25mM NAHCO<sub>3</sub>, 0.34mM NaH<sub>2</sub>PO<sub>4</sub>-H<sub>2</sub>O, 10mM C<sub>3</sub>H<sub>5</sub>NaO<sub>3</sub>, 2mM CaCl<sub>2</sub>-H<sub>2</sub>O, 0.5mM  
410 MgCl<sub>2</sub>-6H<sub>2</sub>O, 1μl/ml Phenol Red, 0.25mM sodium pyruvate, 100units/ml penicillin, 100μg/ml  
411 streptomycin, 1μM epinephrine, 0.02 mM penicillamine, 10μM hypotaurine, 6mg/ml FAF-BSA,  
412 and 10mg/ml heparin.

### 413 *IVF and embryo culture*

414 Cumulus-oocyte complexes (COC) were retrieved by follicular aspiration of ovaries  
415 collected at a commercial abattoir (DeSoto Biosciences, Seymour, TN, USA). Those COCs with at  
416 least three layers of compact cumulus cells and homogeneous cytoplasm were placed in groups of  
417 50 in 2ml sterile glass vials containing 1ml of oocyte maturation medium, covered with mineral oil,  
418 and equilibrated in 5% CO<sub>2</sub>. Tubes with COCs were shipped overnight in a portable incubator  
419 (Minitube USA Inc., Verona, WI, USA) at 38.5°C. Following 24h of maturation, COCs were  
420 washed 3 times in TALP-Hepes followed by a final wash in fertilization media, before placement  
421 in a 4-well dish (Nunc<sup>TM</sup>; Fisher Scientific) containing 0.5ml of fertilization media. Semen from  
422 either Racer (014HO07296) from Accelerated Genetics (Baraboo, WI, USA) or Colt P-red  
423 (7HO10904) from Select Sires (Plain City, OH, USA) was obtained for IVF. Sperm were purified  
424 from frozen-thawed straws using a gradient [50% (v/v) and 90% (v/v)] of Isolate (Irvine Scientific,  
425 Santa Ana, CA), washed two times in fertilization media by centrifugation at 100 RCF, and diluted  
426 to a final concentration of 1 million/ml in the fertilization dish. Fertilization was allowed to  
427 commence for 17–19 h at 38.5°C in a humidified atmosphere of 5% CO<sub>2</sub>. Zygotes were denuded  
428 from the surrounding cumulus cells by vortexing for 4 min in 200μl of TALP-Hepes with 0.5%  
429 (w/v) hyaluronidase (Sigma-Aldrich) and washed in fresh TALP-Hepes.

430 *Time-lapse imaging*

431 Denuded zygotes were transferred to custom Eeva™ 12-well polystyrene dishes (Progyny,  
432 Inc., New York, NY; formerly Auxogyn, Inc.) containing 100µl drops of BO-IVC culture media  
433 (IVF Bioscience; Falmouth, Cornwall, UK) under mineral oil (CooperSurgical, Trumbull, CT) and  
434 cultured at 38.5°C in a humidified atmosphere of 5% CO<sub>2</sub>, 5% O<sub>2</sub>, and 90% N<sub>2</sub>. Embryos were  
435 monitored with an Eeva™ darkfield 2.2.1 or bimodal (darkfield/brightfield) 2.3.5 time-lapse  
436 microscope system (Progyny, Inc) housed in a small tri-gas incubator (Panasonic Healthcare, Japan)  
437 as previously described (Vera-Rodriguez et al. 2015). Images were taken every 5 min with a 0.6  
438 second exposure time. Each image was time stamped with a frame number and all images compiled  
439 into an AVI movie using FIJI software (NIH, Bethesda, MD) version 2.0.0 (Schindelin et al. 2012)  
440 for assessment of mitotic divisions by two independent reviewers.

441 *Immunofluorescent labeling*

442 Embryos were washed in PBS with 0.1% BSA and 0.1% Tween-20 (PBST; Calbiochem,  
443 San Diego, CA) and fixed with 4% paraformaldehyde (Alfa Aesar, Ward Hill, MA) in PBST for 20  
444 min. at room temperature (RT). Once fixed, the embryos were washed with gentle shaking three  
445 times for a total of 15 min. in PBS-T to remove residual fixative. Embryos were permeabilized in  
446 1% Triton-X (Calbiochem) for one hour at RT and washed in PBST as described above. To block  
447 non-specific antibody binding, embryos were transferred to a 7% donkey serum (Jackson  
448 ImmunoResearch Laboratories, Inc., West Grove, PA)/PBS-T solution for either 1 hour at RT or  
449 overnight at 4°C. An antibody against LMNB1 (catalog #ab16048, Abcam, Cambridge, MA) was  
450 diluted 1:1,000, while the CDX2 mouse monoclonal antibody (clone #CDX2-88, Abcam) was  
451 diluted 1:100 in PBS-T with 1% donkey serum, and embryos stained for 1 hour at RT or overnight  
452 at 4°C. Primary LMNB1 and CDX2 immunosignals were detected using 488-conjugated donkey  
453 anti-rabbit or 647-conjugated donkey anti-mouse Alexa Fluor secondary antibodies (Thermo

454 Fisher), respectively, at a 1:250 dilution with 1% donkey serum in PBS-T at RT for 1 hour in the  
455 dark. Embryos were washed in PBS-T and the DNA stained with 1µg/ml DAPI for 15 min. Embryos  
456 were mounted on slides using Prolong Diamond mounting medium (Invitrogen, Carlsbad, CA,  
457 USA). Immunofluorescence was initially visualized on a Nikon Eclipse Ti-U fluorescent  
458 microscope system and images captured using a Nikon DS-Ri2 color camera and confirmed with a  
459 Leica SP5 AOBS spectral confocal system. Z-stacks, 1–5µM apart, were imaged one fluorophore  
460 at a time to avoid spectral overlap between channels. Stacked images and individual channels for  
461 each color were combined into composite images using FIJI software version 2.0.0.

#### 462 *Modified mRNA construction*

463 Plasmids containing the coding sequence (CDS) for mCitrine-Lifeact (Addgene #54733),  
464 which labels filamentous actin (F-actin), mCherry-Histone H2B-C-10 (Addgene #55057), and  
465 mCherry-LAMINB1-10 (Plasmid #55069) were a gift from Dr. Michael Davidson’s laboratory and  
466 deposited in Addgene (Cambridge, MA). Custom primers containing a 5’-T7 promoter sequence  
467 were used to amplify each fluorescent tag-mRNA fusion construct as follows:

468 T7\_mCitrine\_F: CTAGCTTAATACGACTCACTATAGGGCGGTCGCCACCATGGTGA

469 LifeAct\_R: TTA CT TGTACAGCTCGTCCATGCCGAGAGTGATCCCGGC

470 T7\_mCherry\_F: AATTAATACGACTCACTATAGGGAGAGCCACCATGGTGAGCAA

471 H2B\_R: GCGGCCGCTTTACTTGT

472 LAMINB1\_R: TCCGGTGGATCCCTACATAA

473 PCR amplification was performed with high fidelity Platinum Taq polymerase (Thermo Fisher)  
474 under the following conditions: 94°C for 2 min., followed by 35 cycles of 94°C-30 sec., 70°C-30  
475 sec. and, 72°C-3 min. PCR products were purified with the QIAquick PCR Purification kit (Qiagen;  
476 Hilden, Germany), then underwent *in vitro* transcription using the mMessage Machine T7

477 Transcription Kit (Invitrogen). Following the synthesis of capped mRNA, the MEGAclean  
478 transcription clean up kit (Invitrogen) was used to purify and concentrate the final modified mRNA  
479 product.

#### 480 *Live-cell imaging*

481 Bovine zygotes were microinjected with mCitrine-Lifeact and either mCherry-H2B or  
482 mCherry-LAMINB1 mRNAs at a concentration of 20 ng/ul each in the presence of Alexa Fluor  
483 488 labeled Dextran (Invitrogen) using a CellTram vario, electronic microinjector and Transferman  
484 NK 2 Micromanipulators (Eppendorf, Hauppauge, New York, USA). Zygotes that exhibited  
485 mCherry fluorescent signal within 4-6 hours following microinjection were selected for overnight  
486 imaging. Imaging dishes were prepared by placing 20ul drops of BO-IVC media on glass bottom  
487 dishes (Matek Corporation; Ashland, MA) and covering with mineral oil. A Zeiss LSM 880 laser-  
488 scanning confocal microscope with 10X objective and Fast Airy capabilities was used to capture  
489 fluorescent images of embryos for 18-20 hours, which encompassed the first three mitotic divisions.  
490 Z-stack images were taken every 1.5 $\mu$ m for a total of ~60 slices covering a 90um range at 10 min.  
491 intervals. Each fluorophore was acquired independently to prevent crosstalk and maximize  
492 scanning speed. Individual images underwent Airyscan processing using Zeiss software and were  
493 compiled into videos with individual embryo labels using FIJI. Assessment of cytoplasmic and  
494 nuclear structure in embryos during mitotic divisions was completed by two independent reviewers.

#### 495 *Embryo disassembly*

496 Embryos were disassembled under a stereomicroscope equipped with a heated stage and  
497 digital camera (Leica Microsystems, Buffalo Grove, IL) for documentation. The zona pellucida  
498 was removed from each embryo by a 30 second exposure to warm Acidified Tyrode's Solution  
499 (EMD Millipore, Temecula, CA), followed by 30-60 seconds in 0.1% (w/v) pronase (Sigma, St.  
500 Louis, MO, USA). Once ZP free, embryos were washed in TALP-Hepes and gently manipulated

501 using a STRIPPER pipettor (Origio, Måløv, Denmark), with or without brief exposure to warm  
502 0.05% trypsin- EDTA (Thermo Fisher Scientific, Waltham, MA) as necessary, until all blastomeres  
503 were separated. Following disassembly, each blastomere and cellular fragment if present was  
504 washed three times with Ca<sup>2+</sup> and Mg<sup>2+</sup>-free PBS (Fisher Scientific), collected into individual PCR  
505 tubes in ~2μL of PBS, and snap frozen on dry ice. Downstream analysis was completed only for  
506 embryos where the disassembly process was successful for all blastomeres.

### 507 *DNA library preparation*

508 Single blastomeres and cellular fragments underwent DNA extraction and WGA using the  
509 PicoPLEX single-cell WGA Kit (Rubicon Genomics, Ann Arbor, MI) according to the  
510 manufacturer's instructions with slight modifications . Cells were lysed at 75°C for 10 min.  
511 followed by pre-amplification at 95°C for 2 min. and 12 cycles of gradient PCR with PicoPLEX  
512 pre-amp enzyme and primer mix. Pre-amplified DNA was further amplified with PicoPLEX  
513 amplification enzyme and 48 uniquely-indexed Illumina sequencing adapters provided by the kit  
514 or custom adapters with indices designed as previously described (Vitak et al. 2017; Daughtry et  
515 al. 2019). Adapter PCR amplification consisted of a 95°C hotstart for 4 min., four cycles of 95°C  
516 for 20 sec., 63°C for 25 sec., and 72°C for 40 sec. and seven cycles of 95°C for 20 sec. and 72°C  
517 for 55 sec. Libraries were quantified with a Qubit High Sensitivity (HS) DNA assay (Life  
518 Technologies, Carlsbad, CA). Amplified DNA from each blastomere (50ng) and cellular fragment  
519 (25ng) was pooled and purified with AMPure® XP beads (Beckman Coulter, Indianapolis, IN).  
520 Final library quality assessment was performed on a 2200 TapeStation (Agilent, Santa Clara, CA).

### 521 *Multiplex scDNA-seq*

522 Pooled libraries were sequenced on an Illumina NextSeq 500 using a 75-cycle kit with a  
523 modified single-end workflow that incorporated 14 dark cycles at the start of the first read prior to  
524 the imaged cycles. This step excluded the quasi-random priming sequences that are G-rich and lack

525 a fluorophore for the two-color chemistry utilized by the NextSeq platform during cluster  
526 assignment. A total of  $\sim 3.5 \times 10^6$  reads/sample were generated. All raw sample reads were  
527 demultiplexed and sequencing quality assessed with FastQC (Krueger et al. 2011). Illumina  
528 adapters were removed from raw reads with the sequence grooming tool, Cutadapt (Chen et al.  
529 2014), which trimmed 15 bases on the 5' end and five bases from the 3' end, resulting in reads of  
530 120 bp on average. Trimmed reads were aligned to the most recent bovine reference genome,  
531 BosTau8 (Zimin et al. 2009), using the BWA-MEM option of the Burrows-Wheeler Alignment  
532 Tool with default alignment parameters (Salavert Torres J and J 2012). Resulting bam files were  
533 filtered to remove alignments with quality scores below 30 ( $Q < 30$ ) as well as alignment duplicates  
534 that were likely the result of PCR artifacts with the Samtools suite (Ramirez-Gonzalez et al. 2012).  
535 The average number of filtered and uniquely mapped sequencing reads in individual libraries was  
536 between 1.9 and 2.2 million.

### 537 *CNV analysis*

538 CNV was determined by the integration of two previously developed bioinformatics  
539 pipelines, Variable Non-Overlapping Window Circular Binary Segmentation (VNOWC) and the  
540 Circular Binary Segmentation/Hidden Markov Model (CBS/HMM) Intersect termed CHI, as  
541 previously described (Vitak et al. 2017; Daughtry et al. 2019). All CNV calls from the two pipelines  
542 generated profiles of variable sized windows that were intersected on a window-by-window basis.  
543 Because other low-input sequencing studies have shown that CNV can be reliably assessed at a 15  
544 Mb resolution with 0.5-1X genome coverage (Lee et al. 2013; Zhou et al. 2018), we classified  
545 breaks of 15 Mb in length or larger that did not affect the whole chromosome as segmental. Only  
546 whole and segmental CNV calls in agreement between the VNOWC and CHI methods at window  
547 sizes containing 4,000 reads were considered. Chaotic aneuploidy was classified by the loss or gain  
548 of greater than four whole and/or broken chromosomes as previously described (Daughtry et al.  
549 2019). Additional classification of each aneuploidy as meiotic or mitotic in origin was

550 accomplished by determining whether a loss or gain of the same chromosome was detected in all  
551 blastomeres (meiotic) or if different and/or reciprocal chromosome losses and gains were observed  
552 between blastomeres (mitotic).

### 553 *MAO Design*

554 Two non-overlapping MAOs were designed and synthesized by Gene Tools (Philomath,  
555 OR) to specifically target bovine BUB1B (Ensembl transcript ID: ENSBTAT00000009521.5).  
556 BUB1B MAO #1 (TTTCCTTCTGCATCGCCGCCATC) specifically targeted the ATG start codon  
557 of the BUB1B mRNA coding sequence, while BUB1B MAO #2  
558 (CGATCTGAGGCTCTGAAGAAAGGCC) targeted upstream of MAO #1 in the 5' UTR of  
559 bovine *BUB1B*. A Std Control MO (CCTCTTACCTCAGTTACAATTTATA) that targets a splice  
560 site mutant of the human hemoglobin beta-chain (HBB) gene (GenBank accession no. AY605051)  
561 that is not present in the *Bos Taurus* genome served as a control. Both BUB1B and Std Control  
562 MAO were synthesized with a 3'-carboxyfluorescein tag to aid in visualization during cell  
563 transfection and embryo manipulation.

### 564 *Assessment of BUB1B MAO efficiency*

565 Before use in embryos, the BUB1B MAOs were first tested using the Madin-Darby Bovine  
566 Kidney (MDBK) epithelial cell line (Madin and Darby 1958). MDBK cells were plated on poly-L-  
567 lysine treated coverslips, and grown to 70% confluency prior to MAO treatment. The cells were  
568 incubated with 6 $\mu$ l/ml Endo-Porter delivery reagent containing DMSO (Gene Tools) and 2, 4, or  
569 8 $\mu$ M of either BUB1B MAO #1 or Std control MAO and cultured in Eagle's Minimum Essential  
570 Medium modified to contain Earle's Balanced Salt Solution, non-essential amino acids, 2 mM L-  
571 glutamine, 1 mM sodium pyruvate, and 1500 mg/L sodium bicarbonate, 10% (v/v) FBS and  
572 antibiotics (50 U penicillin, 50 $\mu$ g streptomycin) in 5% CO<sub>2</sub> at 37°C. After 36 hours, cells were  
573 synchronized at metaphase in the presence of 0.03 $\mu$ g of colcemid (Sigma) for 12 hours, and

574 collected for staining at 48 hours post MAO treatment. Cells were washed in PBS, followed by a  
575 single 20 min. fixation and permeabilization step using 4% paraformaldehyde (Alfa Aesar, Ward  
576 Hill, MA) with 1% Triton-X (Calbiochem) in PBS. Additional PBS washes were completed prior  
577 to blocking with 7% donkey serum (Jackson ImmunoResearch Laboratories, Inc., West Grove, PA)  
578 in PBS for either 1 hour at RT or overnight at 4°C. A primary antibody against BUB1B (ab28193,  
579 Abcam, Cambridge, MA) was diluted 1:1000 in PBS with 1% donkey serum and cells were  
580 incubated overnight at 4°C. BUB1B antibody binding was detected using a 568- conjugated  
581 donkey, anti-rabbit Alexa Fluor secondary antibody (Thermo Fisher) at a 1:250 dilution with 1%  
582 donkey serum in PBS at RT for 1 hour in the dark. Cells were washed in PBS and the DNA stained  
583 with 1 µg/ml DAPI for 15 min. The coverslips with adherent cells were then mounted on slides  
584 using Prolong Diamond mounting medium (Invitrogen, Carlsbad, CA, USA). Immunofluorescence  
585 was visualized on a Nikon Eclipse Ti-U fluorescent microscope system and representative  
586 fluorescent images captured with a Nikon DS-Ri2 color camera. Using FIJI, background  
587 fluorescence was subtracted from the red (BUB1B) channel, followed by individual channels of  
588 each color for combination into a composite image. BUB1B immunostaining was visually assessed  
589 at each MAO concentration for 100 metaphase cells per treatment group.

#### 590 *BUB1B knockdown and validation*

591 Zygotes underwent cytoplasmic injection with 3'-carboxyfluorescein-labeled MAO at 20  
592 hours post fertilization as described above. A concentration of 0.3 mM MAO was used based on  
593 previous findings that Std Control MAO at this concentration was the maximum which allowed  
594 normal blastocyst formation rates. Following microinjection, embryos were cultured up to the  
595 blastocyst stage as described above with or without imaging on the Eeva™ darkfield 2.2.1  
596 microscope system. Upon developmental arrest, embryos were collected for immunostaining, gene  
597 expression analysis, or disassembled into single cells (as described above) for downstream analysis.  
598 To further validate MAO specificity, bovine embryos were co-injected with BUB1B modified



599 mRNA at a concentration of approximately 3nl (75pg) of mRNA per embryo in addition to BUB1B  
500 MAO #1. The BUB1B coding sequence (CDS) was amplified from the plasmid, pcDNA5-EGFP-  
501 AID-BubR1 (Addgene #47330), followed by mutation of the MAO binding site using the Q5 site  
502 directed mutagenesis kit (NEB) according to the manufacturer's instructions. Briefly, custom  
503 primers (forward: 5'-aaaaagagggaGGTGCTCTGAGTGAAGCC-3', and reverse: 5'-  
504 aactgcagccatATGGGATCCAGCTCTGCT-3') were designed to mutate the region of the BUB1B  
505 CDS targeted by the MAO without affecting the amino acid sequence. Exponential amplification  
506 of the template plasmid using high fidelity DNA polymerase was followed by a single step  
507 phosphorylation, ligation and DpnI restriction enzyme digestion. NEB 5-apha competent cells were  
508 transformed with the mutated plasmid, followed by DNA miniprep isolation using QIAprep spin  
509 columns (Qiagen). Mutated plasmids were identified by Sanger sequencing performed by the  
510 ONPRC Molecular and Cellular Biology Core using a custom designed primer  
511 (TTGGTGAATAGCTGGGACTATG). Following identification and isolation, the mutated  
512 plasmid served as a template to synthesize a PCR product containing a T7 promoter using Platinum  
513 Taq (Invitrogen). Custom primers (forward:  
514 CTAGCTTAATACGACTCACTATAGGGAGCGCCACCATGGCTGCAGTTAAAAAAGAG,  
515 reverse: CAATCTGTGAGACTTGATTGCCTAGCTCACTGAAAGAGCAAAGCCCCAG)  
516 were designed for use with the T7 mMessage mMachine Ultra Kit as described above.

### 517 *Quantitative RT-PCR analysis*

518 Gene expression was analyzed in non-injected, Std control MAO, or BUB1B MAO injected  
519 embryos using the BioMark Dynamic Array microfluidic system (Fluidigm Corp., So. San  
520 Francisco, CA, USA). All embryos were collected within 36 hours post fertilization as described  
521 above. Individual embryos were pre-amplified according to the manufacturer's "two-step single cell  
522 gene expression" protocol (Fluidigm Corp.) using SuperScript VILO cDNA synthesis kit  
523 (Invitrogen), TaqMan PreAmp Master Mix (Applied Biosystems, Foster City, CA, USA), and gene-

524 specific primers designed to span exons using Primer-BLAST (NCBI). Bovine fibroblasts and no  
525 RT template samples were used as controls. Pre-amplified cDNA was loaded into the sample inlets  
526 of a 96 × 96 dynamic array (DA; Fluidigm Corp.) and assayed in triplicate. A total of 10 reference  
527 genes were assayed for use as relative expression controls. Cycle threshold (Ct) values were  
528 normalized to the two most stable housekeeping genes (*RPL15* and *GUSB*) using qBase<sup>+</sup> 3.2  
529 software (Biogazelle; Ghent, Belgium). Calculated normalized relative quantity (CNRQ) values  
530 were averaged across triplicates ± the standard error and graphed using Morpheus  
531 (<https://software.broadinstitute.org/morpheus/>).

### 532 *Statistical analysis*

533 To determine statistical differences between MAO concentrations in MDBK cells, log-  
534 binomial modeling using the Generalized Estimating Equations approach was performed and Tukey  
535 adjusted p-values reported to adjust for multiple comparisons. From the qRT-PCR results, averaged  
536 CNRQ values of each gene was compared across embryo groups using the Mann-Whitney U-test.  
537 An unadjusted p-value ≤ 0.05 was considered statistically significant.

538

### 539 **ACKNOWLEDGEMENTS**

540 We gratefully acknowledge Dr. Tom Spencer at the University of Missouri-Columbia for the  
541 Madin-Darby Bovine Kidney (MDBK) epithelial cells. K.E.B. was supported by the NIH/NICHD  
542 Postdoctoral Individual National Research Service Award (5F32HD095550-01). B.L.D. was  
543 supported by the P.E.O. Scholar Award, N.L. Tartar Research Fellowship, and T32 Reproductive  
544 Biology NIH Training Grant (T32 HD007133). The authors acknowledge the support of the Oregon  
545 National Primate Research Center (ONPRC) Integrated Pathology Core for confocal microscopy  
546 (supported by S10RR024585) that operates under the auspices of the ONPRC NIH/OD core grant  
547 (P51OD011092). This work was supported by OHSU/ONPRC start-up funds (to SLC) and the

548 NIH/NICHD (R01HD086073-A1). The content of this paper is solely the responsibility of the  
549 authors and does not necessarily represent the official views of the NIH.

550

## 551 **AUTHOR CONTRIBUTIONS**

552 Conceptualization, K.E.B. and S.L.C.; Methodology, K.E.B., B.L.D., and S.L.C.; Software, K.E.B.,  
553 B.D., and M.Y.Y.; Validation, K.E.B. and S.L.C.; Formal Analysis, K.E.B. and S.L.C.;  
554 Investigation, K.E.B. and B.L.D.; Data Curation, S.S.F. and S.L.C.; Writing – Original Draft,  
555 K.E.B. and S.L.C.; Writing – Review & Editing, K.E.B., B.L.D., B.D., M.Y.Y., S.S.F., L.C., and  
556 S.L.C.; Visualization, K.E.B., B.D., and M.Y.Y.; Supervision, S.S.F., L.C., and S.L.C.; Project  
557 Administration, S.L.C.; Funding Acquisition, K.E.B., L.C., and S.L.C.

558

## 559 **DECLARATION OF INTERESTS**

560 The authors declare no competing interests.

561

## 562 **REFERENCES**

563 Alper MM, Brinsden P, Fischer R, Wikland M. 2001. To blastocyst or not to blastocyst? That is  
564 the question. *Hum Reprod* **16**: 617-619.

565 Baran V, Brzakova A, Rehak P, Kovarikova V, Solc P. 2016. PLK1 regulates spindle formation  
566 kinetics and APC/C activation in mouse zygote. *Zygote* **24**: 338-345.

567 Bibi N, Parveen Z, Rashid S. 2013. Identification of potential Plk1 targets in a cell-cycle specific  
568 proteome through structural dynamics of kinase and Polo box-mediated interactions. *PLoS*  
569 *One* **8**: e70843.

570 Bolton H, Graham SJL, Van der Aa N, Kumar P, Theunis K, Fernandez Gallardo E, Voet T,  
571 Zernicka-Goetz M. 2016. Mouse model of chromosome mosaicism reveals lineage-  
572 specific depletion of aneuploid cells and normal developmental potential. *Nat Commun* **7**:  
573 11165.

574 Braude P, Bolton V, Moore S. 1988. Human gene expression first occurs between the four- and  
575 eight-cell stages of preimplantation development. *Nature* **332**: 459-461.

576 Chavez SL, Loewke KE, Han J, Moussavi F, Colls P, Munne S, Behr B, Reijo Pera RA. 2012.  
577 Dynamic blastomere behaviour reflects human embryo ploidy by the four-cell stage. *Nat*  
578 *Commun* **3**: 1251.

579 Chen C, Khaleel SS, Huang H, Wu CH. 2014. Software for pre-processing Illumina next-  
580 generation sequencing short read sequences. *Source Code Biol Med* **9**: 8.

581 Crasta K, Ganem NJ, Dagher R, Lantermann AB, Ivanova EV, Pan Y, Nezi L, Protopopov A,  
582 Chowdhury D, Pellman D. 2012. DNA breaks and chromosome pulverization from errors  
583 in mitosis. *Nature* **482**: 53-58.

- 584 Daughtry BL, Rosenkrantz JL, Lazar NH, Fei SS, Redmayne N, Torkenczy KA, Adey A, Yan M,  
585 Gao L, Park B et al. 2019. Single-cell sequencing of primate preimplantation embryos  
586 reveals chromosome elimination via cellular fragmentation and blastomere exclusion.  
587 *Genome Res* **29**(3): 367-382.
- 588 Destouni A, Zamani Esteki M, Catteeuw M, Tsuiko O, Dimitriadou E, Smits K, Kurg A,  
589 Salumets A, Van Soom A, Voet T et al. 2016. Zygotes segregate entire parental genomes  
590 in distinct blastomere lineages causing cleavage-stage chimerism and mixoploidy.  
591 *Genome Res* **26**: 567-578.
- 592 Elowe S, Dulla K, Uldschmid A, Li X, Dou Z, Nigg EA. 2010. Uncoupling of the spindle-  
593 checkpoint and chromosome-congression functions of BubR1. *J Cell Sci* **123**: 84-94.
- 594 Elowe S, Hummer S, Uldschmid A, Li X, Nigg EA. 2007. Tension-sensitive Plk1  
595 phosphorylation on BubR1 regulates the stability of kinetochore microtubule interactions.  
596 *Genes Dev* **21**: 2205-2219.
- 597 Fang G. 2002. Checkpoint protein BubR1 acts synergistically with Mad2 to inhibit anaphase-  
598 promoting complex. *Mol Biol Cell* **13**: 755-766.
- 599 Gascoigne KE, Taylor SS. 2008. Cancer cells display profound intra- and interline variation  
700 following prolonged exposure to antimetabolic drugs. *Cancer Cell* **14**: 111-122.
- 701 Hassold T, Chen N, Funkhouser J, Jooss T, Manuel B, Matsuura J, Matsuyama A, Wilson C,  
702 Yamane JA, Jacobs PA. 1980. A cytogenetic study of 1000 spontaneous abortions. *Ann*  
703 *Hum Genet* **44**: 151-178.
- 704 Hornak M, Kubicek D, Broz P, Hulinska P, Hanzalova K, Griffin D, Machatkova M, Rubes J.  
705 2016. Aneuploidy Detection and mtDNA Quantification in Bovine Embryos with  
706 Different Cleavage Onset Using a Next-Generation Sequencing-Based Protocol.  
707 *Cytogenet Genome Res* **150**: 60-67.
- 708 Kai Y, Moriwaki H, Yumoto K, Iwata K, Mio Y. 2018. Assessment of developmental potential of  
709 human single pronucleated zygotes derived from conventional in vitro fertilization. *J*  
710 *Assist Reprod Genet* **35**: 1377-1384.
- 711 Kettenbach AN, Schweppe DK, Faherty BK, Pechenick D, Pletnev AA, Gerber SA. 2011.  
712 Quantitative phosphoproteomics identifies substrates and functional modules of Aurora  
713 and Polo-like kinase activities in mitotic cells. *Sci Signal* **4**: rs5.
- 714 Kiessling AA, Bletsa R, Desmarais B, Mara C, Kallianidis K, Loutradis D. 2010. Genome-wide  
715 microarray evidence that 8-cell human blastomeres over-express cell cycle drivers and  
716 under-express checkpoints. *J Assist Reprod Genet* **27**: 265-276.
- 717 Krueger F, Andrews SR, Osborne CS. 2011. Large scale loss of data in low-diversity illumina  
718 sequencing libraries can be recovered by deferred cluster calling. *PLoS One* **6**: e16607.
- 719 Lampson MA, Kapoor TM. 2005. The human mitotic checkpoint protein BubR1 regulates  
720 chromosome-spindle attachments. *Nat Cell Biol* **7**: 93-98.
- 721 Lee J, Lee U, Kim B, Yoon J. 2013. A computational method for detecting copy number  
722 variations using scale-space filtering. *BMC Bioinformatics* **14**: 57.
- 723 Li D, Morley G, Whitaker M, Huang JY. 2010. Recruitment of Cdc20 to the kinetochore requires  
724 BubR1 but not Mad2 in *Drosophila melanogaster*. *Mol Cell Biol* **30**: 3384-3395.
- 725 Madin SH, Darby NB, Jr. 1958. Established kidney cell lines of normal adult bovine and ovine  
726 origin. *Proc Soc Exp Biol Med* **98**: 574-576.
- 727 Mantikou E, Wong KM, Repping S, Mastenbroek S. 2012. Molecular origin of mitotic  
728 aneuploidies in preimplantation embryos. *Biochim Biophys Acta* **1822**: 1921-1930.
- 729 Mayer W, Smith A, Fundele R, Haaf T. 2000. Spatial separation of parental genomes in  
730 preimplantation mouse embryos. *J Cell Biol* **148**: 629-634.
- 731 McCoy RC, Demko Z, Ryan A, Banjevic M, Hill M, Sigurjonsson S, Rabinowitz M, Fraser HB,  
732 Petrov DA. 2015a. Common variants spanning PLK4 are associated with mitotic-origin  
733 aneuploidy in human embryos. *Science* **348**: 235-238.

- 734 McCoy RC, Demko ZP, Ryan A, Banjevic M, Hill M, Sigurjonsson S, Rabinowitz M, Petrov DA.  
735 2015b. Evidence of Selection against Complex Mitotic-Origin Aneuploidy during  
736 Preimplantation Development. *PLoS Genet* **11**: e1005601.
- 737 McCoy RC, Newnham LJ, Ottolini CS, Hoffmann ER, Chatzimeletiou K, Cornejo OE, Zhan Q,  
738 Zaninovic N, Rosenwaks Z, Petrov DA et al. 2018. Tripolar chromosome segregation  
739 drives the association between maternal genotype at variants spanning PLK4 and  
740 aneuploidy in human preimplantation embryos. *Hum Mol Genet* **27**(14): 2573-2585.
- 741 Meraldi P, Sorger PK. 2005. A dual role for Bub1 in the spindle checkpoint and chromosome  
742 congression. *EMBO J* **24**: 1621-1633.
- 743 Middelkamp S, van Tol HTA, Spierings DCJ, Boymans S, Guryev V, Roelen BAJ, Lansdorp PM,  
744 Cuppen E, Kuijk EW. 2020. Sperm DNA damage causes genomic instability in early  
745 embryonic development. *Sci Adv* **6**: eaaz7602.
- 746 Miyazawa K. 2011. Encountering unpredicted off-target effects of pharmacological inhibitors. *J*  
747 *Biochem* **150**: 1-3.
- 748 Ottolini CS, Kitchen J, Xanthopoulou L, Gordon T, Summers MC, Handyside AH. 2017. Tripolar  
749 mitosis and partitioning of the genome arrests human preimplantation development in  
750 vitro. *Sci Rep* **7**: 9744.
- 751 Perez-Mongiovi D, Malmanche N, Bousbaa H, Sunkel C. 2005. Maternal expression of the  
752 checkpoint protein BubR1 is required for synchrony of syncytial nuclear divisions and  
753 polar body arrest in *Drosophila melanogaster*. *Development* **132**: 4509-4520.
- 754 Plante L, Plante C, Shepherd DL, King WA. 1994. Cleavage and 3H-uridine incorporation in  
755 bovine embryos of high in vitro developmental potential. *Mol Reprod Dev* **39**: 375-383.
- 756 Ramirez-Gonzalez RH, Bonnal R, Caccamo M, Maclean D. 2012. Bio-samtools: Ruby bindings  
757 for SAMtools, a library for accessing BAM files containing high-throughput sequence  
758 alignments. *Source Code Biol Med* **7**: 6.
- 759 Reichmann J, Nijmeijer B, Hossain MJ, Eguren M, Schneider I, Politi AZ, Roberti MJ, Hufnagel  
760 L, Hiiragi T, Ellenberg J. 2018. Dual-spindle formation in zygotes keeps parental genomes  
761 apart in early mammalian embryos. *Science* **361**: 189-193.
- 762 Salavert Torres J BEI, Dominguez AT, Hernandez Garcia V, Medina Castello I, Tarraga Gimenez  
763 J., J DB. 2012. Using GPUs for the exact alignment of short-read genetic sequences by  
764 means of the Burrows-Wheeler transform. *IEEE/ACM Trans Comput Biol Bioinform* **9**: 1245-  
765 1256.
- 766 Santamaria A, Wang B, Elowe S, Malik R, Zhang F, Bauer M, Schmidt A, Sillje HH, Korner R,  
767 Nigg EA. 2011. The Plk1-dependent phosphoproteome of the early mitotic spindle. *Mol*  
768 *Cell Proteomics* **10**: M110 004457.
- 769 Schaeffer AJ, Chung J, Heretis K, Wong A, Ledbetter DH, Lese Martin C. 2004. Comparative  
770 genomic hybridization-array analysis enhances the detection of aneuploidies and  
771 submicroscopic imbalances in spontaneous miscarriages. *Am J Hum Genet* **74**: 1168-1174.
- 772 Schindelin J, Arganda-Carreras I, Frise E, Kaynig V, Longair M, Pietzsch T, Preibisch S, Rueden  
773 C, Saalfeld S, Schmid B et al. 2012. Fiji: an open-source platform for biological-image  
774 analysis. *Nat Methods* **9**: 676-682.
- 775 Schneider I, Ellenberg J. 2019. Mysteries in embryonic development: How can errors arise so  
776 frequently at the beginning of mammalian life? *PLoS Biol* **17**: e3000173.
- 777 Schwartzman JM, Sotillo R, Benezra R. 2010. Mitotic chromosomal instability and cancer: mouse  
778 modelling of the human disease. *Nat Rev Cancer* **10**: 102-115.
- 779 Singla S, Iwamoto-Stohl LK, Zhu M, Zernicka-Goetz M. 2020. Autophagy-mediated apoptosis  
780 eliminates aneuploid cells in a mouse model of chromosome mosaicism. *Nat Commun* **11**:  
781 2958.
- 782 Soto M, Raaijmakers JA, Medema RH. 2019. Consequences of Genomic Diversification Induced  
783 by Segregation Errors. *Trends Genet* **35**(4): 279-291.

- 784 Starostik MR, Sosina OA, McCoy RC. 2020. Single-cell analysis of human embryos reveals  
785 diverse patterns of aneuploidy and mosaicism. *Genome Res* **30**(6): 814-825.
- 786 Sugimura S, Akai T, Hashiyada Y, Somfai T, Inaba Y, Hirayama M, Yamanouchi T, Matsuda H,  
787 Kobayashi S, Aikawa Y et al. 2012. Promising system for selecting healthy in vitro-  
788 fertilized embryos in cattle. *PLoS One* **7**: e36627.
- 789 Suijkerbuijk SJ, Vleugel M, Teixeira A, Kops GJ. 2012. Integration of kinase and phosphatase  
790 activities by BUBR1 ensures formation of stable kinetochore-microtubule attachments.  
791 *Dev Cell* **23**: 745-755.
- 792 Treff NR, Krisher RL, Tao X, Garnsey H, Bohrer C, Silva E, Landis J, Taylor D, Scott RT,  
793 Woodruff TK et al. 2016. Next Generation Sequencing-Based Comprehensive  
794 Chromosome Screening in Mouse Polar Bodies, Oocytes, and Embryos. *Biol Reprod* **94**:  
795 76.
- 796 Tsuiko O, Catteuw M, Zamani Esteki M, Destouni A, Bogado Pascottini O, Besenfelder U,  
797 Havlicek V, Smits K, Kurg A, Salumets A et al. 2017. Genome stability of bovine in vivo-  
798 conceived cleavage-stage embryos is higher compared to in vitro-produced embryos. *Hum*  
799 *Reprod* **32**: 2348-2357.
- 800 Tsuiko O, Jatsenko T, Parameswaran Grace LK, Kurg A, Vermeesch JR, Lanner F, Altmae S,  
801 Salumets A. 2019. A speculative outlook on embryonic aneuploidy: Can molecular  
802 pathways be involved? *Dev Biol* **447**: 3-13.
- 803 Vanneste E, Voet T, Le Caignec C, Ampe M, Konings P, Melotte C, Debrock S, Amyere M,  
804 Vikkula M, Schuit F et al. 2009. Chromosome instability is common in human cleavage-  
805 stage embryos. *Nat Med* **15**: 577-583.
- 806 Vazquez-Diez C, Paim LMG, FitzHarris G. 2019. Cell-Size-Independent Spindle Checkpoint  
807 Failure Underlies Chromosome Segregation Error in Mouse Embryos. *Curr Biol* **29**: 865-  
808 873 e863.
- 809 Vazquez-Diez C, Yamagata K, Trivedi S, Haverfield J, FitzHarris G. 2016. Micronucleus  
810 formation causes perpetual unilateral chromosome inheritance in mouse embryos. *Proc*  
811 *Natl Acad Sci U S A* **113**: 626-631.
- 812 Vera-Rodriguez M, Chavez SL, Rubio C, Reijo Pera RA, Simon C. 2015. Prediction model for  
813 aneuploidy in early human embryo development revealed by single-cell analysis. *Nat*  
814 *Commun* **6**: 7601.
- 815 Vitak SA, Torkency KA, Rosenkrantz JL, Fields AJ, Christiansen L, Wong MH, Carbone L,  
816 Steemers FJ, Adey A. 2017. Sequencing thousands of single-cell genomes with  
817 combinatorial indexing. *Nat Methods* **14**: 302-308.
- 818 Webster A, Schuh M. 2017. Mechanisms of Aneuploidy in Human Eggs. *Trends Cell Biol* **27**: 55-  
819 68.
- 820 Wei Y, Multi S, Yang CR, Ma J, Zhang QH, Wang ZB, Li M, Wei L, Ge ZJ, Zhang CH et al.  
821 2011. Spindle assembly checkpoint regulates mitotic cell cycle progression during  
822 preimplantation embryo development. *PLoS One* **6**: e21557.
- 823 Wong CC, Loewke KE, Bossert NL, Behr B, De Jonge CJ, Baer TM, Reijo Pera RA. 2010. Non-  
824 invasive imaging of human embryos before embryonic genome activation predicts  
825 development to the blastocyst stage. *Nat Biotechnol* **28**: 1115-1121.
- 826 Yao T, Suzuki R, Furuta N, Suzuki Y, Kabe K, Tokoro M, Sugawara A, Yajima A, Nagasawa T,  
827 Matoba S et al. 2018. Live-cell imaging of nuclear-chromosomal dynamics in bovine in  
828 vitro fertilised embryos. *Sci Rep* **8**: 7460.
- 829 Zhang CZ, Spektor A, Cornils H, Francis JM, Jackson EK, Liu S, Meyerson M, Pellman D. 2015.  
830 Chromothripsis from DNA damage in micronuclei. *Nature* **522**: 179-184.
- 831 Zhou B, Ho SS, Zhang X, Pattni R, Haraksingh RR, Urban AE. 2018. Whole-genome sequencing  
832 analysis of CNV using low-coverage and paired-end strategies is efficient and outperforms  
833 array-based CNV analysis. *J Med Genet* **55**: 735-743.

334 Zimin AV, Delcher AL, Florea L, Kelley DR, Schatz MC, Puiu D, Hanrahan F, Pertea G, Van  
335 Tassell CP, Sonstegard TS et al. 2009. A whole-genome assembly of the domestic cow,  
336 *Bos taurus*. *Genome Biol* **10**: R42.  
337

338 **TABLES**

339

|                                                         | <b>Untreated<br/>(Non-<br/>Injected)</b> | <b>Std Control<br/>MAO</b> | <b>BUB1B MAO<br/>#1</b> | <b>BUB1B<br/>MAO #2</b> |
|---------------------------------------------------------|------------------------------------------|----------------------------|-------------------------|-------------------------|
| <b>No<br/>Division</b>                                  | 8.3%<br>(N=15/180)                       | 24.7%<br>(N=20/81)         | 37.5%<br>(N=18/48)      | 33.3%<br>(N=12/36)      |
| <b>Attempted<br/>Division</b>                           | 10%<br>(N=18/180)                        | 2.5%<br>(N=2/81)           | 8.3%<br>(N=4/48)        | 0.0%<br>(N=0/36)        |
| <b>Normal Bipolar/<br/>Symmetric Division</b>           | 72.8%<br>(N=107/147)                     | 62.7%<br>(N=37/59)         | 34.6%<br>(N=9/26)       | 25.0%<br>(N=6/24)       |
| <b>Abnormal<br/>Multipolar/<br/>Asymmetric Division</b> | 27.2%<br>(N=40/147)                      | 37.3%<br>(N=22/59)         | 65.4%<br>(N=17/26)      | 75.0%<br>(N=18/24)      |
| <b>Total Number of<br/>Embryos</b>                      | 180                                      | 81                         | 48                      | 36                      |

**Table 1: Division dynamics in untreated and MAO embryo treatment groups.** Summary of the percentage of bovine zygotes that exhibited no division or attempted to divide as well as those that had normal bipolar/symmetric versus abnormal multipolar/asymmetric divisions following no treatment or microinjection with Std Control, BUB1B MAO #1, or BUB1B MAO #2. Attempted division was defined by the identification of cleavage furrows without the completion of cytokinesis. Note that in contrast to the controls, BUB1B MAO #1 and BUB1B MAO #2-injected embryos were more likely to undergo multipolar and/or asymmetric divisions.

340



341 **FIGURES**

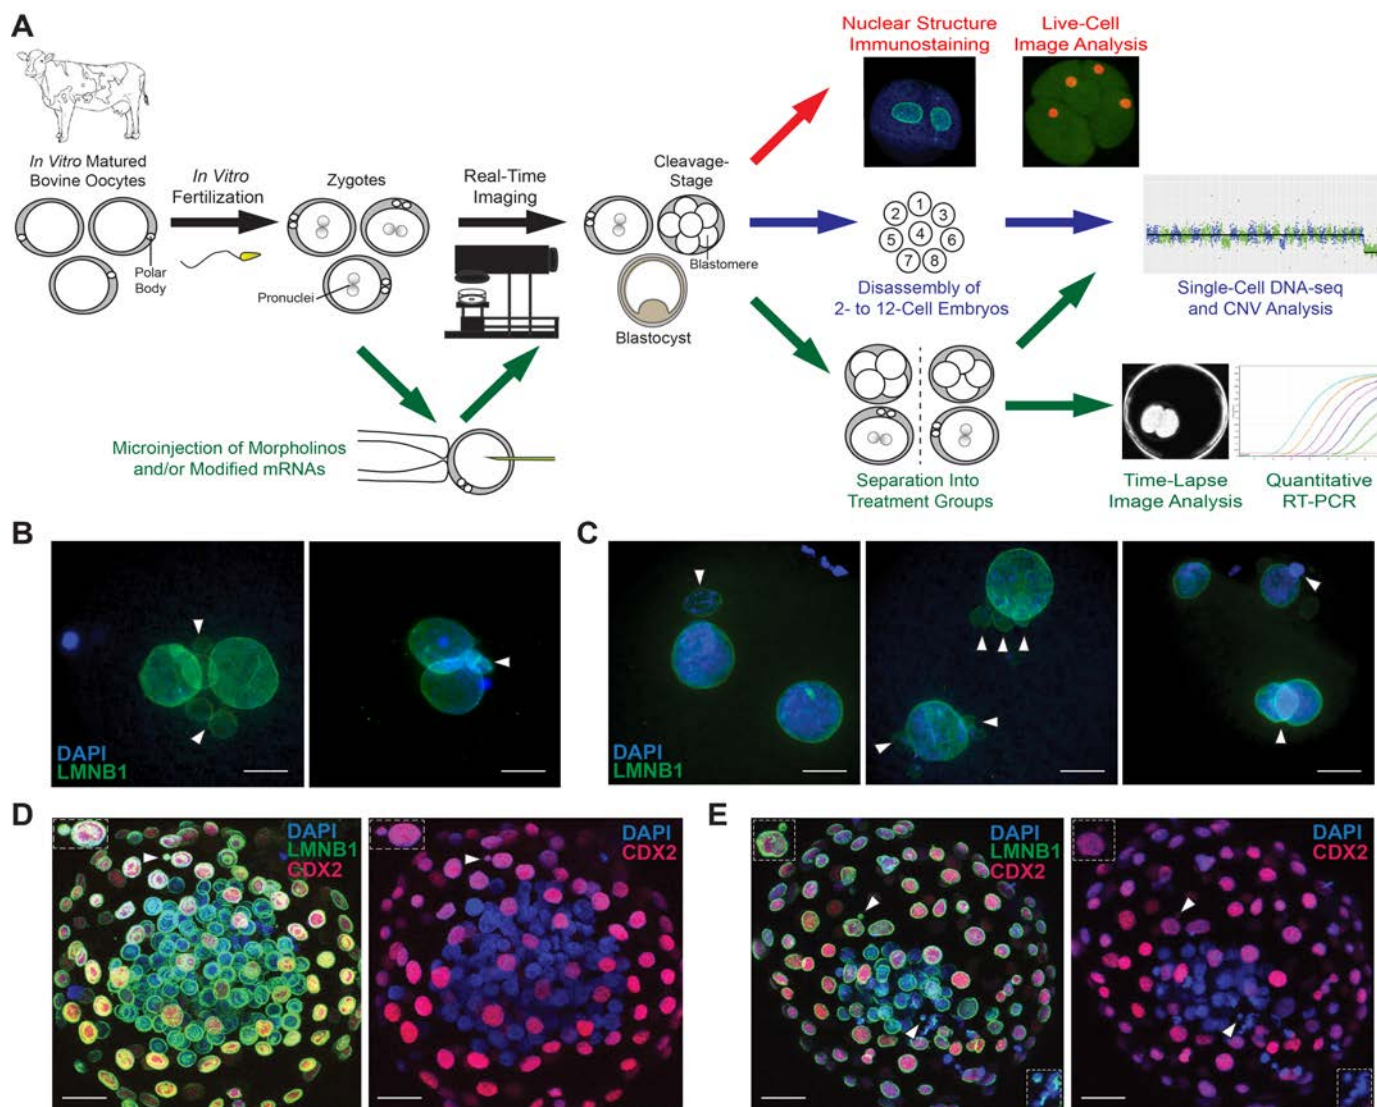

**Figure 1. Investigating the dynamics of mitotic chromosome segregation and MCC fidelity in bovine embryos.** (A) *In vitro* produced bovine oocytes underwent IVF and the resulting zygotes non-invasively monitored by time-lapse image analysis until collection for immunostaining of nuclear structure. Another subset of zygotes was microinjected with fluorescently labeled modified mRNAs and chromosome segregation visualized during the first three mitotic divisions in real-time by live-cell confocal microscopy. Cleavage-stage embryos were disassembled into single blastomeres at the 2- to 12-cell stage for scDNA-seq and CNV analysis to determine the precise frequency of aneuploidy at multiple cleavage stages. Other zygotes were microinjected with non-overlapping morpholinos targeting the mitotic checkpoint protein, BUB1B, and/or modified BUB1B mRNA to test the effect and specificity of MCC inhibition on chromosome segregation, division dynamics, and preimplantation development. Gene expression profiling was also conducted on a subset of MCC deficit zygotes versus controls by quantitative RT-PCR to identify changes in gene abundance and molecular pathways associated with BUB1B knockdown. (B) Immunostaining of zygotes and (C) cleavage-stage embryos with LMNB1 (green) using DAPI (blue) to visualize DNA revealed several micro- and multi-nuclei (white arrows). (D) Blastocysts also immunostained for the trophoblast marker, CDX2 (red), showed that micronuclei are often present in the TE, (E) but can also be retained within the ICM of the embryo. Scale bar = 10µm.

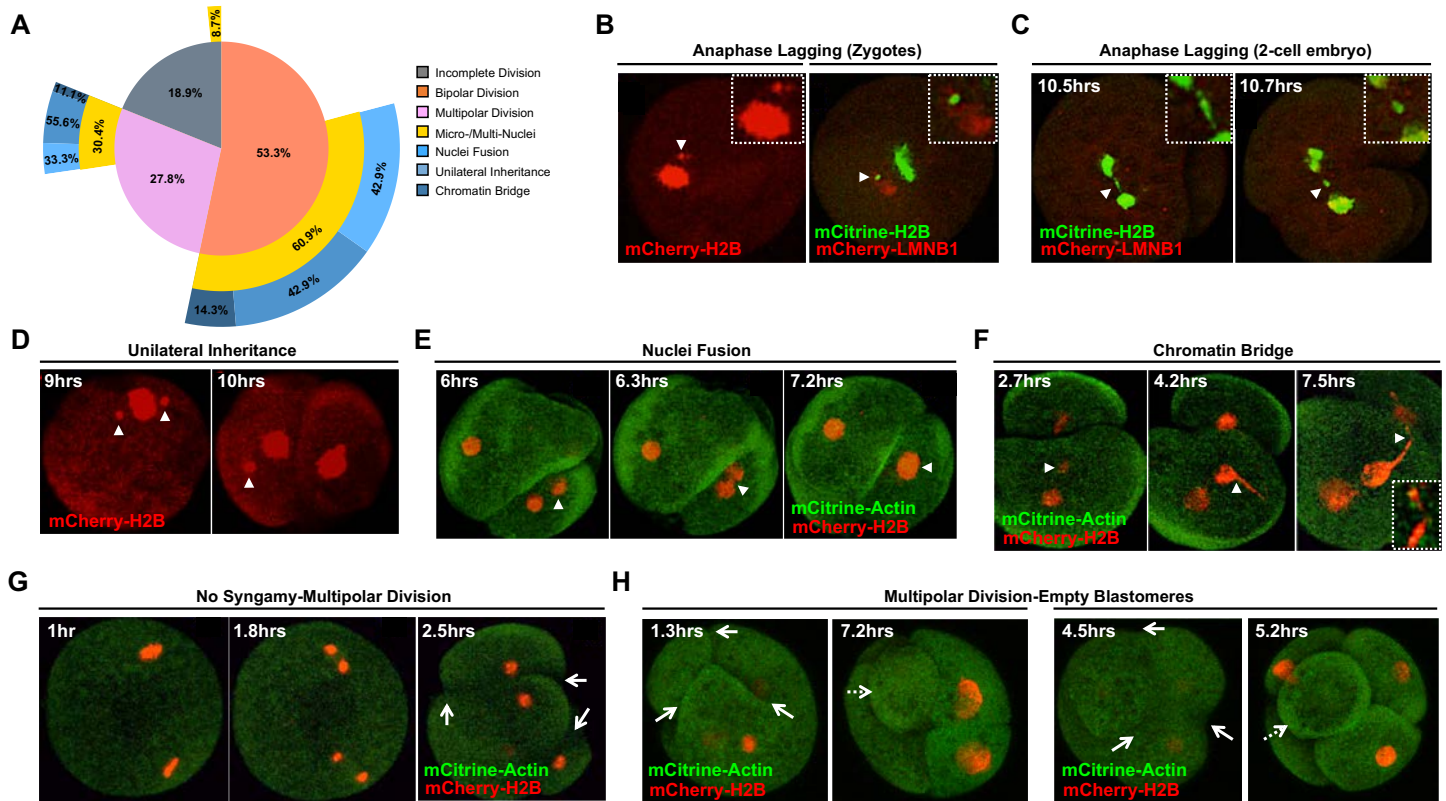

**Figure 2. Live-cell fluorescent imaging reveals micronuclei fate and uniparental genome distribution to daughter cells.** Bovine zygotes were microinjected with fluorescently labeled modified mRNAs (mCitrine or mCherry) to visualize DNA (Histone H2B) or nuclear structure (LMNB1) and distinguish blastomeres (F-Actin) by live-cell confocal microscopy during the first three mitotic divisions (N=90). **(A)** A Venn-Pie that shows the percentage of embryos that did not complete cytokinesis (gray), exhibited normal bipolar divisions (orange), or underwent multipolar divisions at the zygote or 2-cell stage (pink). The percentage of embryos with micro- and/or multi-nuclei (MN; yellow) associated with each type of division is also shown. Micronuclei fate is represented as those that formed a chromatin bridge (dark blue), exhibited unilateral inheritance (medium blue), or re-fused with the primary nucleus (light blue). Note that most embryos underwent bipolar divisions and were more likely to contain micronuclei than multipolar embryos. **(B)** Anaphase lagging of chromosomes (white arrowheads) was detected in certain embryos at the zygote or **(C)** 2-cell stage prior to micronuclei formation. **(D)** An examination of micronuclei fate demonstrated that a relatively equal proportion persist and undergo unilateral inheritance or **(E)** fuse back with the primary nucleus, **(F)** with a small number exhibiting what appeared to be a chromatin bridge between blastomeres following micronuclei formation (white arrowheads). **(G)** The majority of multipolar embryos (white solid arrows) bypassed pronuclear fusion (syngamy) prior to the abnormal division and **(H)** often produced blastomeres with uniparental origins and/or no apparent nuclear structure (white dashed arrows). Numbers in upper left corner represent the time in hours (hrs) since the start of imaging.

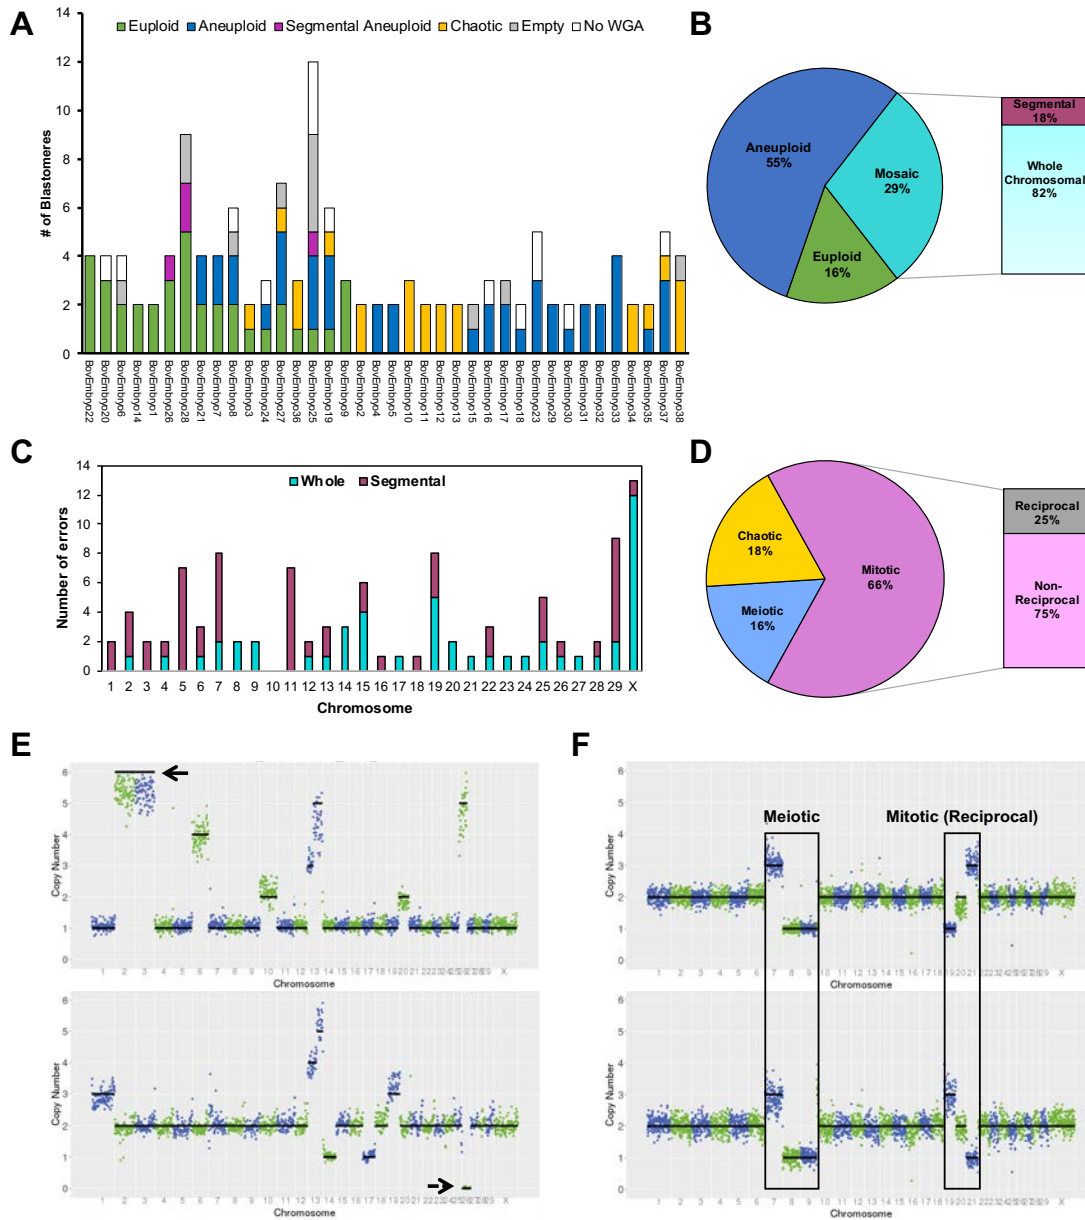

**Figure 3. Comprehensive assessment of chromosomal abnormalities in early cleavage-stage embryos by scDNA-seq.** (A) Whole chromosome and sub-chromosomal CNV was evaluated in bovine embryos from the 2- to 12-cell stage (N=38). Stacked bars represent all blastomeres (N=133) classified as euploid (green), aneuploid (blue), segmental aneuploid (purple), chaotic aneuploid (yellow), empty (grey) or failing to undergo WGA (white). (B) Pie chart showing the overall chromosome status of the embryos. (C) Number of whole or segmental chromosome losses and/or gains affecting each chromosome. Note the frequent mis-segregation of the X-chromosome and DNA breakage in chromosomes 5, 7, 11, and 29. (D) The percentage of aneuploid embryos with each type of chromosomal error. (E) CNV plots of blastomeres from two different embryos with chaotic aneuploidy showing up to 6 copies of certain chromosomes (top; black solid arrow) and a complete loss of other chromosomes (bottom; black dashed arrow). (F) Blastomeres from a 2-cell embryo with meiotic errors (Ch.7, 8, and 9) propagated during the first cleavage division that also experienced mitotic mis-segregation of different chromosomes (Ch.19 and 21) that were reciprocal.

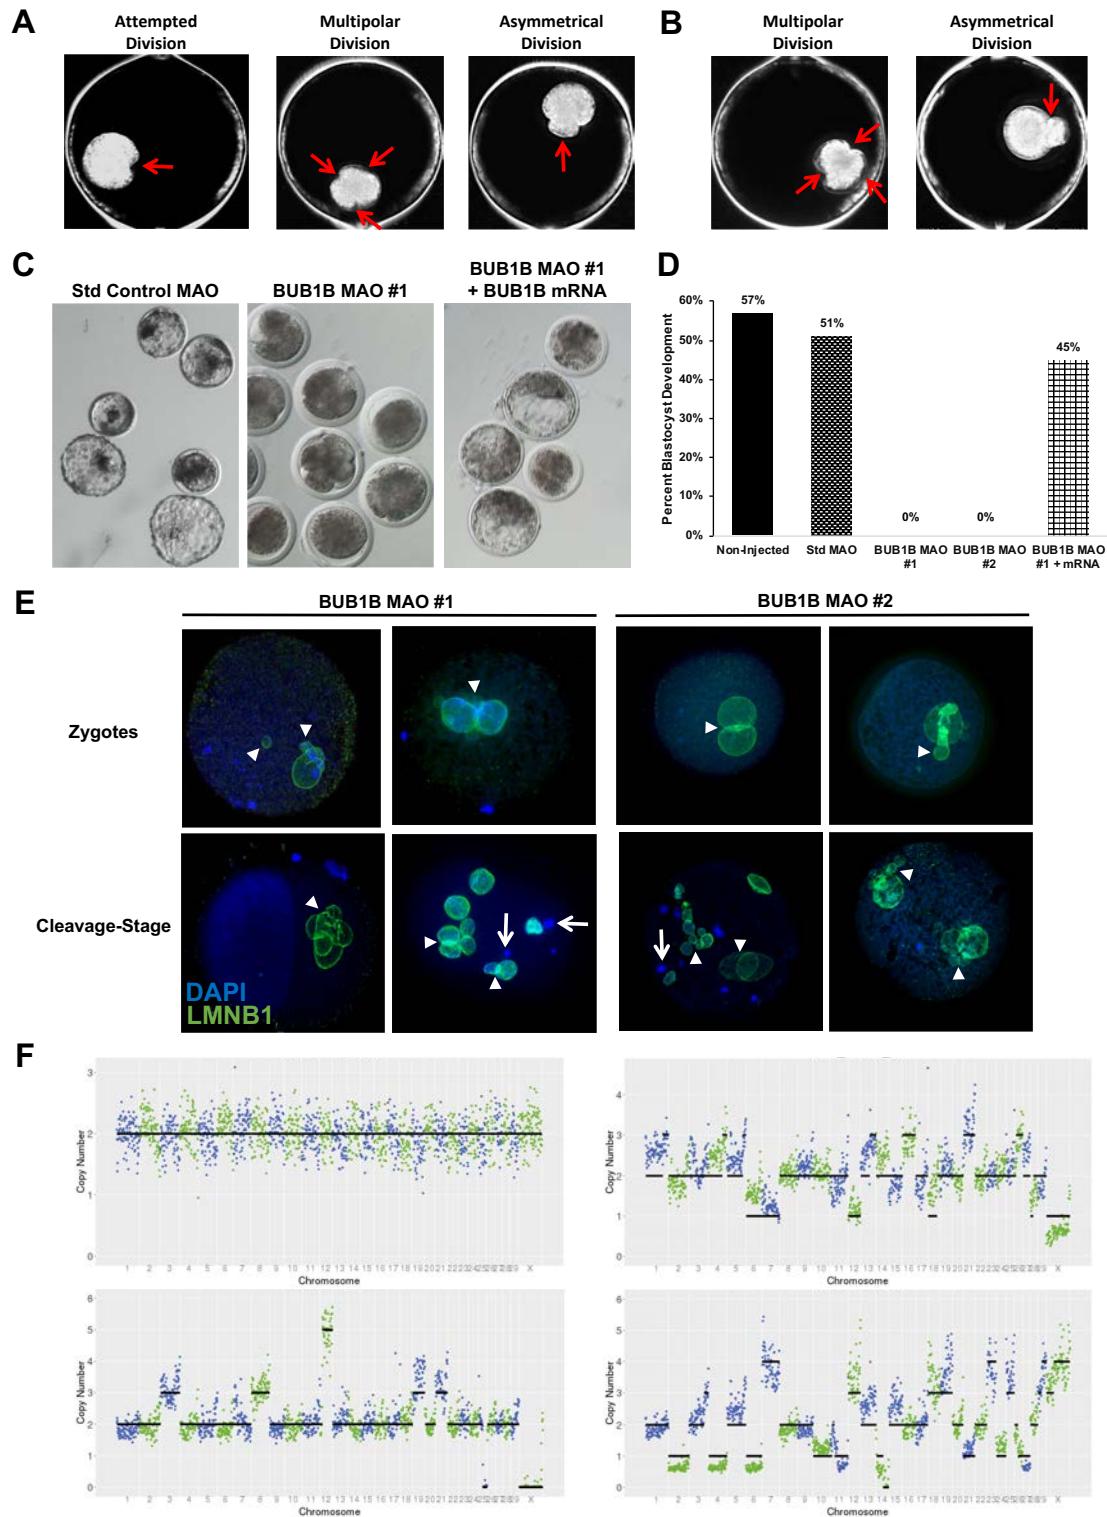

**Figure 4. BUB1B knockdown induces multipolar divisions, chaotic aneuploidy, and developmental arrest.** (A) Darkfield time-lapse imaging frames depicting the various embryo phenotypes (red arrows), including attempted division, multipolar division, and blastomere asymmetry observed following BUB1B MAO #1 or (B) BUB1B MAO #2 microinjection in bovine zygotes. (C) Representative stereomicroscope images of embryos and blastocysts from the Std control MAO, BUB1B MAO #1, and BUB1B MAO #1 plus BUB1B modified mRNA treatment groups. (D) Bar graph of the percentage of embryos that reached the blastocyst stage in non-injected, Std control MAO, BUB1B MAO #1, BUB1B MAO #2, or BUB1B MAO #1 plus BUB1B modified mRNA injected zygotes. While no blastocysts were obtained following BUB1B MAO #1 or #2 treatment, the co-injection of BUB1 MAO #1 and BUB1B modified mRNA was able to almost fully rescue the phenotype and restore blastocyst formation rates to that observed in controls. (E) Confocal images of LMNB1 (green) immunostaining in BUB1B MAO #1 or #2 treated embryos stained with DAPI (blue). Severely abnormal nuclear morphology and the presence of both micro- and multi-nuclei were detected (denoted with white arrowheads) in embryos at the zygote stage (top row) and cleavage-stage that exhibited abnormal cell divisions (bottom row). Note the DNA without nuclear envelope (white arrows) and the blastomere that completely lacked nuclear material in the 2-cell embryo located in the lower left image; Scale bars = 10 $\mu$ m. (E) CNV plots of blastomeres from different cleavage-stage embryos disassembled into single cells following BUB1B #1 MAO injection. While some euploid blastomeres were detected in BUB1B-injected embryos (upper left plot), most exhibited chaotic aneuploidy with multiple whole and sub-chromosomal losses and gains.

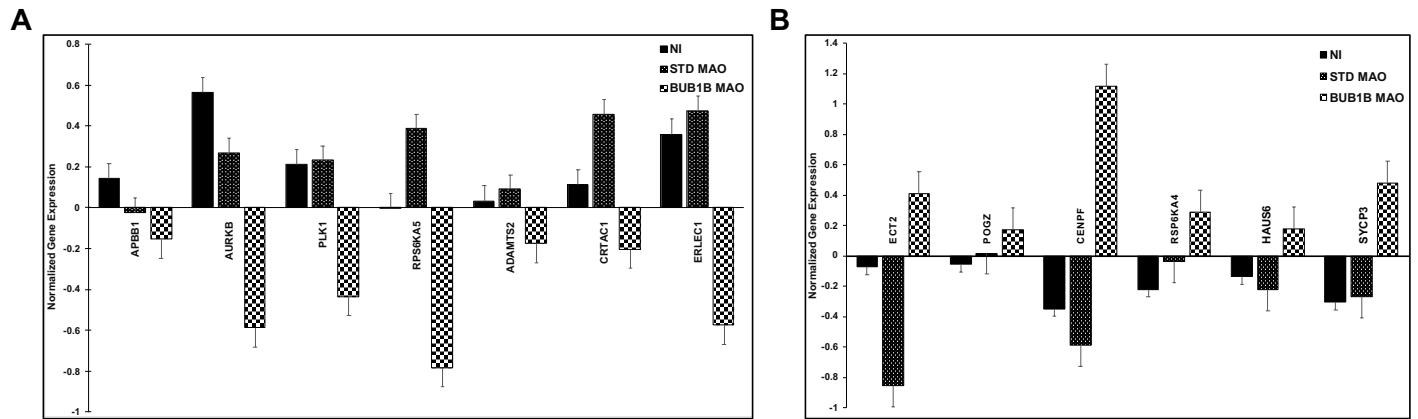

**Figure 5. BUB1B deficiency in zygotes impacts the abundance of other cell cycle and mitosis-related genes.** The relative abundance of several mitotic, cell cycle, developmentally-regulated, and cell survival genes was assessed via microfluidic quantitative RT-PCR (qRT-PCR) in non-injected (NI; N=5), Std Control MAO (N=5), and BUB1B MAO #1 (N=5) individual zygotes using gene-specific primers. **(A)** The genes that were significantly downregulated ( $p \leq 0.05$ ) in BUB1B MAO-injected embryos compared to the NI and Std Control MAO groups  $\pm$  standard error is shown in the bar graph. **(B)** A bar graph of the genes that were significantly upregulated in BUB1B MAO-injected embryos relative to the controls  $\pm$  standard error. CNRQ values of each gene was compared across embryo groups using the Mann-Whitney U-test. The full list of the 96 genes with primer sequences assessed by qRT-PCR is available in **Supplemental Fig. S3** and **Supplemental Table S2**, respectively.

349  
350

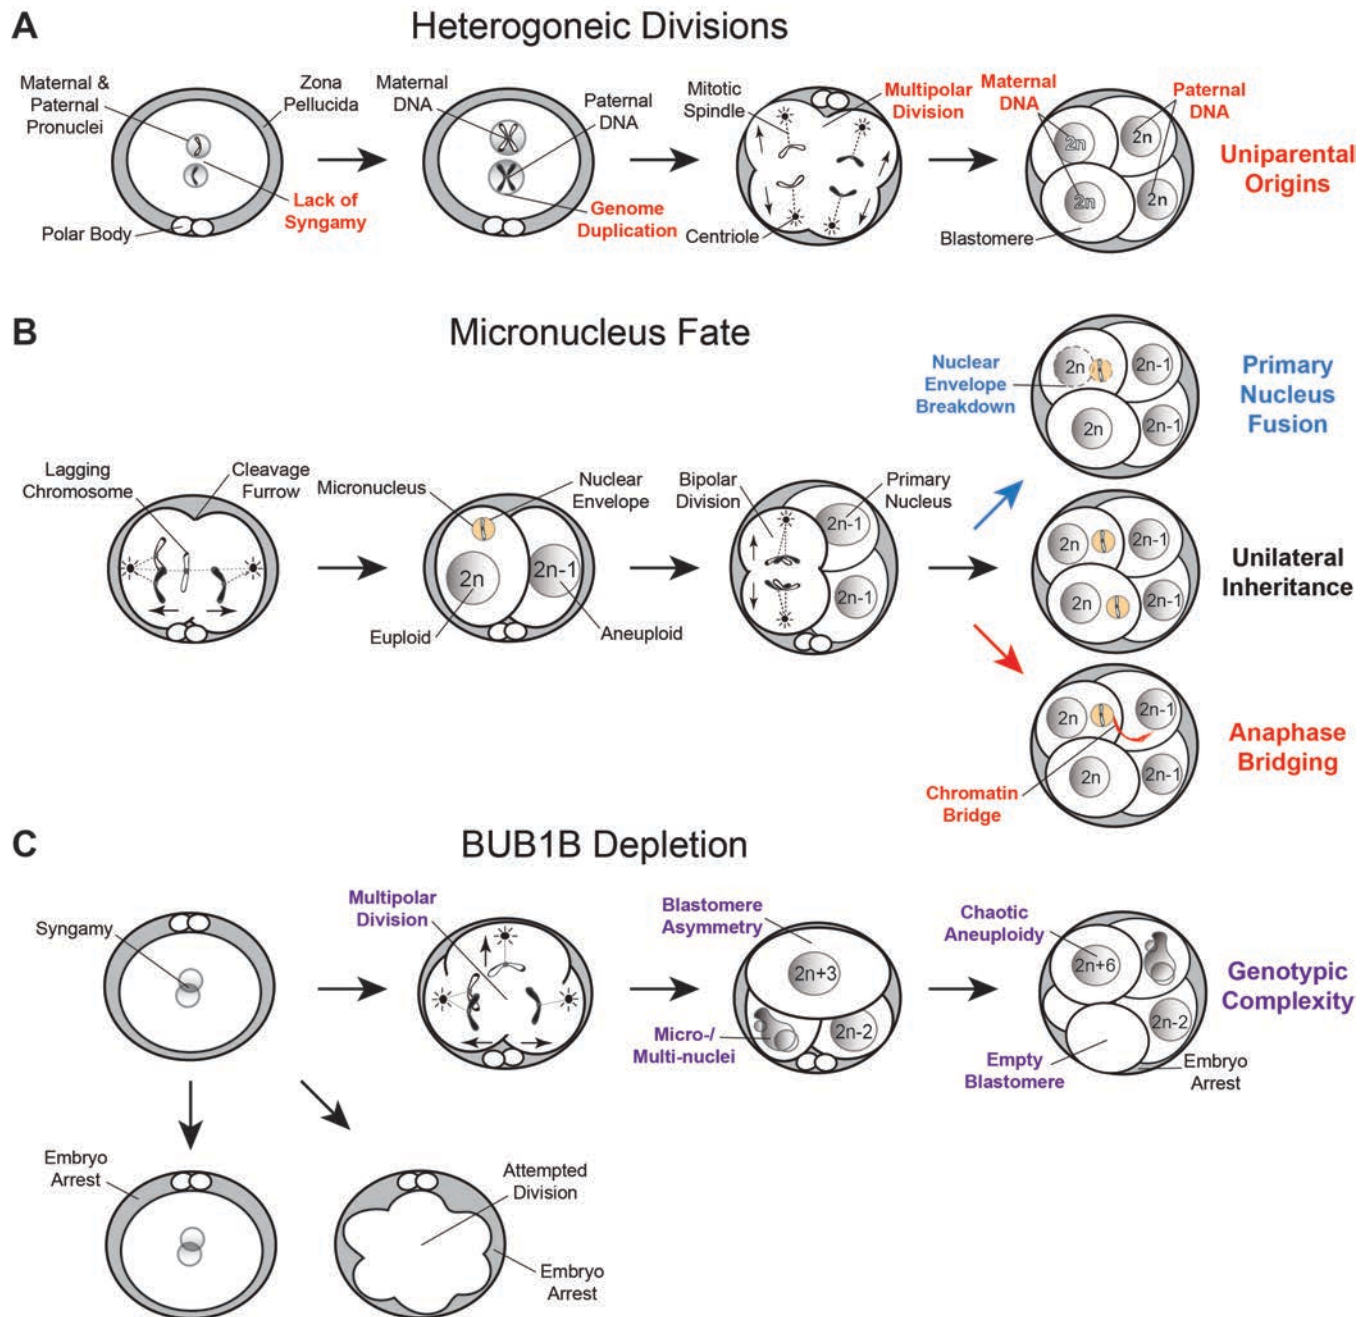

**Figure 6. Summary of the major findings from the imaging, scDNA-seq, and gene knockdown studies. (A)** Simplified model of how the lack of maternal and paternal pronuclear fusion (syngamy) at the zygote stage, followed by genome duplication and multipolar divisions, contributes to blastomeres with uniparental origins, or those that only contain maternal or paternal DNA. **(B)** Live-cell imaging also revealed the formation of anaphase lagging chromosomes likely from merotelic attachments prior to or during the first mitotic division. The chromosome(s) become encapsulated in nuclear envelope to form a micronucleus and the embryo continues to divide normally. In these subsequent bipolar divisions, most micronuclei either fuse back with the primary nucleus upon nuclear envelope breakdown or persist and undergo unilateral inheritance, but some micronuclei form a chromatin bridge with the nucleus of another blastomere during anaphase. **(C)** The depletion of BUB1B in zygotes resulted in no division or attempted division and embryo arrest, while multipolar divisions, blastomere asymmetry, and micro-/multi-nuclei were observed in MCC-deficient embryos that completed the first cytokinesis. These abnormal divisions also produced daughter cells with chaotic aneuploidy and/or empty blastomeres with no nuclear structure that induced embryo arrest and suggested that the lack of MCC permits the genotypic complexity detected at the early cleavage-stages of preimplantation development.

351 **Supplemental Materials**

352 **Supplemental Figures**

353

354

355

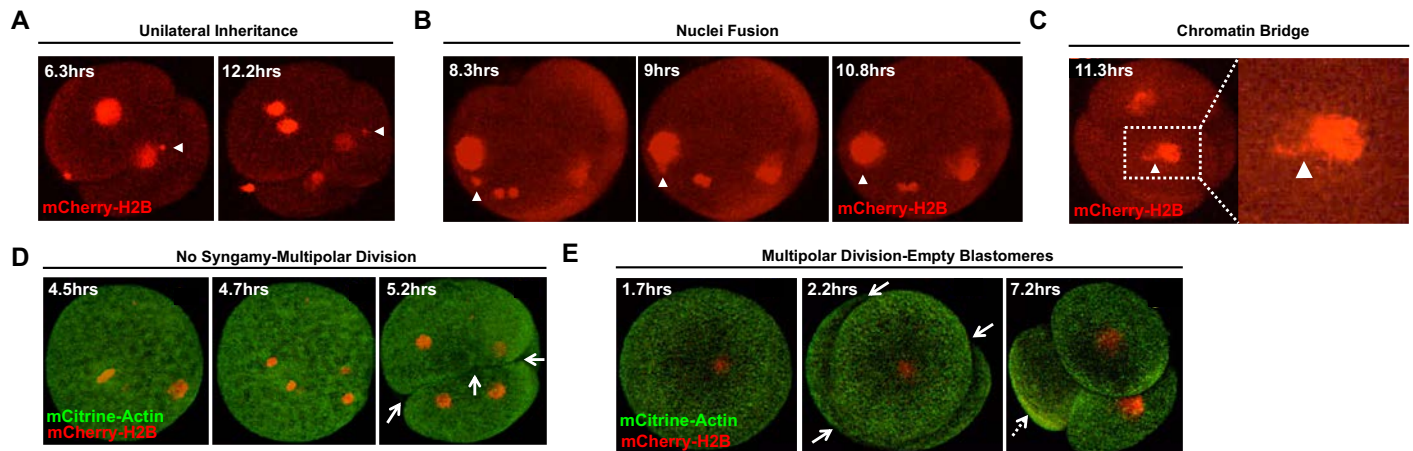

**Supplemental Figure S1. Additional live-cell images representative of embryos with different phenotypes.** Live-cell confocal microscopy of bovine zygotes microinjected with fluorescently labeled modified mRNAs to visualize DNA (Histone H2B-mCherry; red) and distinguish blastomeres (Actin-mCitrine; green) during the first three mitotic divisions. **(A)** Examples of other embryos with micronuclei that undergo unilateral inheritance, **(B)** fuse back with the primary nucleus, or **(C)** form a chromatin bridge (white arrowheads). **(D)** Images of additional embryos that bypassed pronuclear fusion (syngamy) prior to a multipolar division (white solid arrows) to produce blastomeres with uniparental origins and/or **(E)** no apparent nuclear structure (white dashed arrows). Individual frames are represented in hours (hrs) from the start of imaging.



**A**

**BUB1B targeting sequences:** (BUB1B MAO #1; BUB1B MAO #2)

5'-GTTGCAGAAGGAGGCCAGG[CGATCTGAGGCTCTGAAGAAAGGCC]CGC...  
...GGGAGGACGAGGCCCTGAGCCGGGAATGCAG[G(ATG)GCGGCGATGCAGAAGGAAA]GGG-3'

**B**

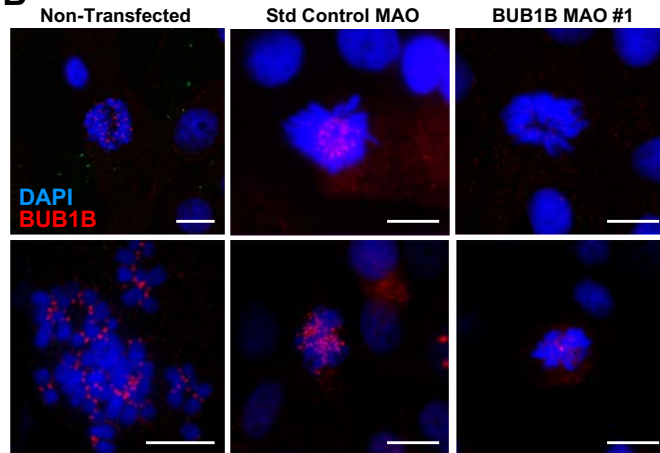

**C**

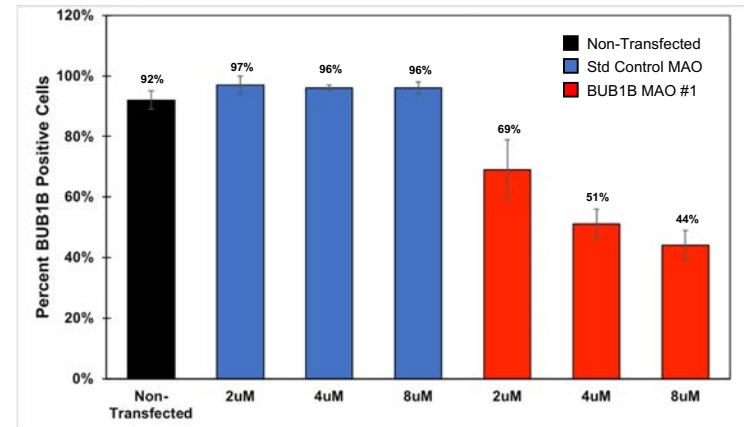

**Supplemental Figure S2. BUB1B MAO design and knockdown efficiency.** (A) DNA sequences of two non-overlapping MAOs designed to target the ATG start site (shown in red, BUB1B MAO #1) and the 5' UTR (depicted in blue, BUB1B MAO #2) of BUB1B. (B) BUB1B knockdown efficiency was assessed in synchronized MDBK cells following 48 hours of treatment with 3 μl/ml of colcemid alone (non-transfected), the Std control MAO, or BUB1B MAO #1 via immunofluorescence. BUB1B protein expression was analyzed in DAPI stained (blue) MDBK cells. Note the lack of or reduced number of BUB1B positive foci (red) in the BUB1B MAO #1 treated cells compared to the controls; Scale bar = 20 μm. (C) Bar graph showing the percentage of MDBK cells in metaphase with BUB1B expression after colcemid treatment (black) or transfection with different concentrations (2, 4, and 8 μM) of the Std control MAO (blue) or BUB1B MAO #1 (red). While the number of cells exhibiting BUB1B positive foci was similar between the non-transfected and Std MAO controls, a dose-dependent decrease in BUB1B expression was observed following BUB1B MAO #1 treatment.

357

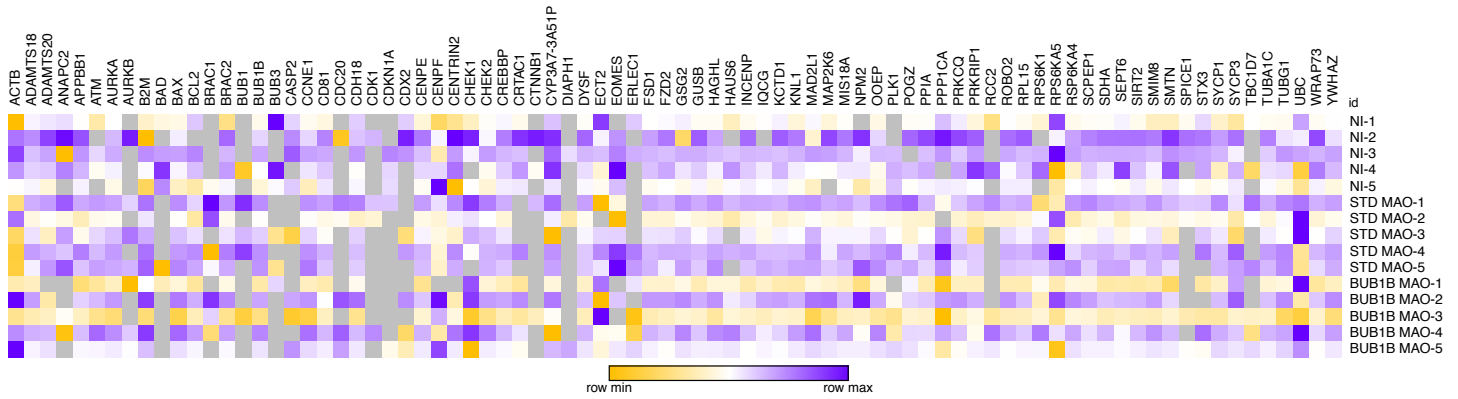

**Supplemental Figure S3. Comprehensive assessment of gene expression patterns in zygotes.** Heat map of all mitotic, cell cycle, developmentally-regulated, and cell survival genes assessed in individual BUB1B MAO #1 versus non-injected and Std Control-injected MAO bovine zygotes via microfluidic qRT-PCR. Cycle threshold (Ct) values were normalized to the most stable reference genes (RPL15 and GUSB) across embryo groups and presented as the average. Gray squares indicated no expression, whereas yellow, white, and purple squares correspond to low, medium, and high expression, respectively.

358

359

360 **Supplementary Tables**

361  
362 **Supplemental Table S1. Sequencing statistics of all embryonic and control samples.** A table  
363 depicting the number or percentage of reads following de-multiplexing of embryonic (with embryo  
364 stage) and fibroblast samples at each step of the post-sequencing process, including adaptor  
365 removal, repeat masking, genome mapping, and quality assessment. The sequencing kit used and  
366 whether single- or paired-end is also included.

367



371 **Supplemental Movies**

372

373 **Movie S1. Live-cell fluorescent imaging of early cleavage divisions.** Bovine zygotes were  
374 microinjected with fluorescently labeled modified mRNAs to mCitrine-Actin (green) and mCherry-  
375 Histone H2B (red) to distinguish blastomeres and DNA, respectively, and early mitotic divisions  
376 visualized by live-cell confocal microscopy. Note the micro-/multi-nuclei in embryos #3, #4, and  
377 #11, chromatin bridge in embryo #1, lack of syngamy in embryos #3 and #11, multipolar divisions  
378 in embryos #1, #3-6, #11, and #15, and production of empty blastomeres in embryos #5 and #15.

379

380 **Movie S2. MCC-deficient embryos struggle to divide.** A bovine zygote following BUB1B MAO  
381 microinjection attempted to divide by forming multiple cleavage furrows, but never successfully  
382 completed cytokinesis.

383

384 **Movie S3. Multipolar divisions are observed in MCC-deficient embryos.** Certain bovine  
385 zygotes were able to undergo cytokinesis even with BUB1B knockdown, but these divisions were  
386 abnormal with multipolar cleavage.

387

388 **Movie S4. MCC deficiency causes blastomere asymmetry.** Besides abnormal divisions, BUB1B-  
389 injected bovine embryos often exhibited blastomere asymmetry following the multipolar cleavage.
